# Supplementary material for: Determination of monolayer-protected gold nanoparticle ligand–shell morphology using NMR
Source: PubMed Central journal article supplement — Nat Commun. 2012 Nov 13;3:1182–. doi: 10.1038/ncomms2155 (PMC3514491; doi:10.1038/ncomms2155), 2012-11-13
Supplement: ncomms2155-s1.pdf [file ncomms2155-s1.pdf]

# Determination of monolayer-protected gold nanoparticles' ligand shell morphology via NMR

Xiang Liu<sup>1,2</sup>, Miao Yu<sup>1,2</sup>, Hyewon Kim<sup>2</sup>, Marta Mameli<sup>1</sup> and Francesco Stellacci\*<sup>1,2</sup>

<sup>1</sup>*Institute of Materials, École Polytechnique Fédérale de Lausanne, Switzerland*

<sup>2</sup>*Department of Materials Science and Engineering, Massachusetts Institute of Technology, 77  
Massachusetts Avenue, Cambridge, MA 02139 (USA)*

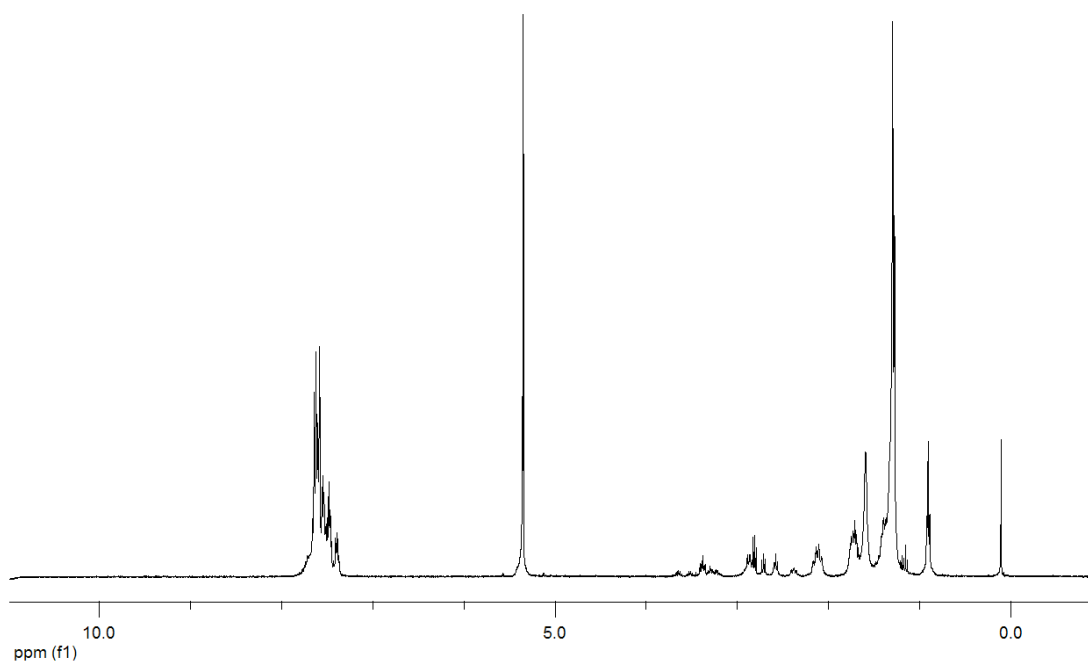

**Figure S1.** Representative NMR spectrum collected after decomposing the gold core via cyanide etching showing the actual ligand composition on nanoparticles.

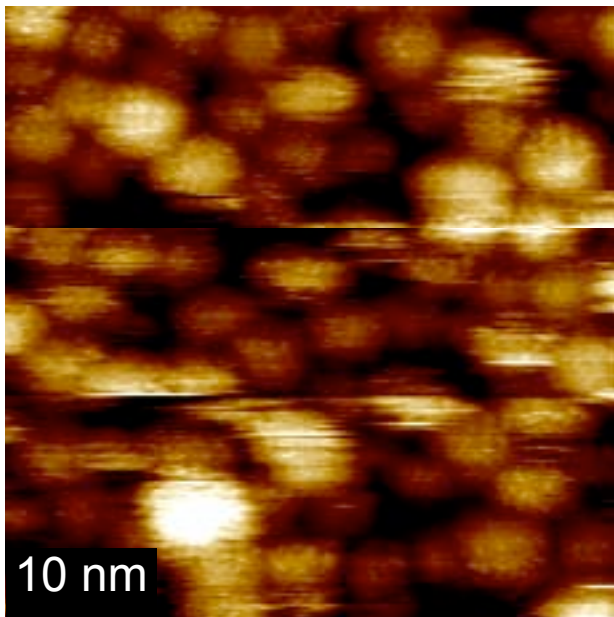

**Figure S2.** STM images of striped nanoparticles Au-DPT<sub>0.58</sub>DDT<sub>0.42</sub>

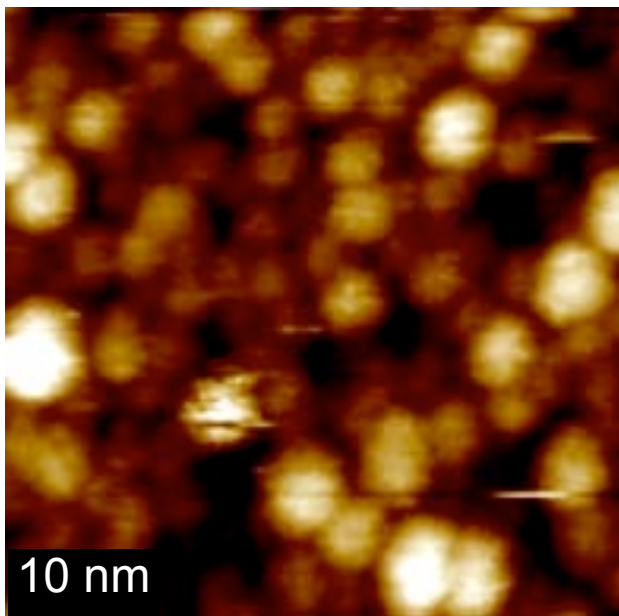

**Figure S3.** STM images of Janus nanoparticles Au-DPT<sub>0.56</sub>DDT<sub>0.44</sub>

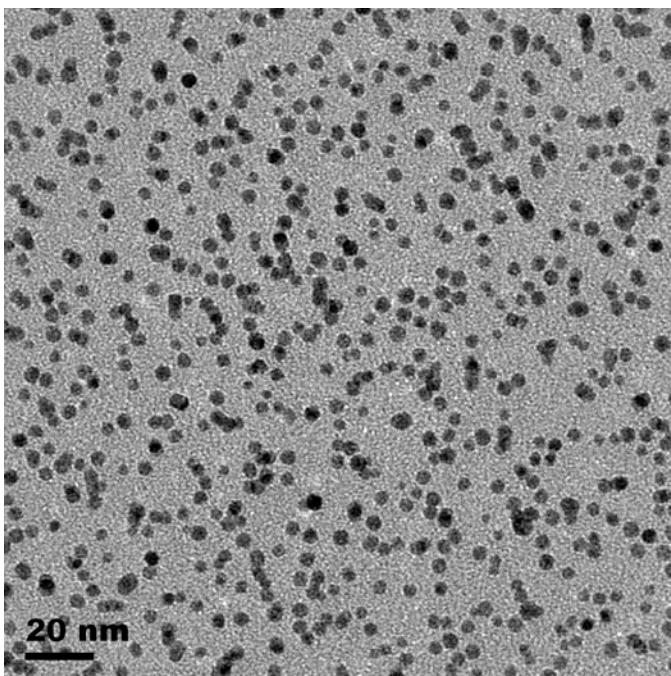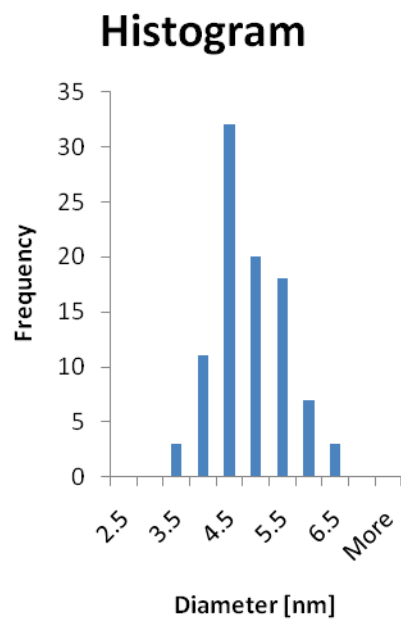

**Figure S4a.** TEM image of randomly mixed Au-DPT<sub>0.22</sub>DMOT<sub>0.78</sub> ( $D=4.54\pm 0.82$  nm)

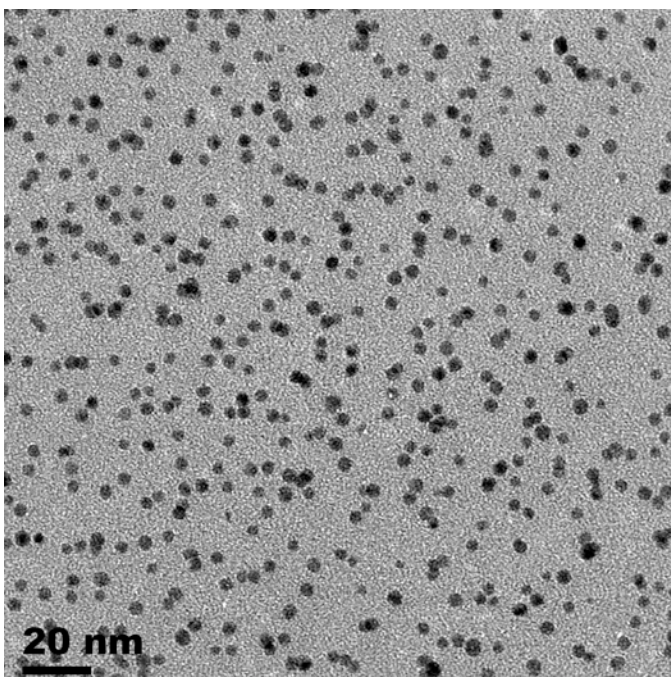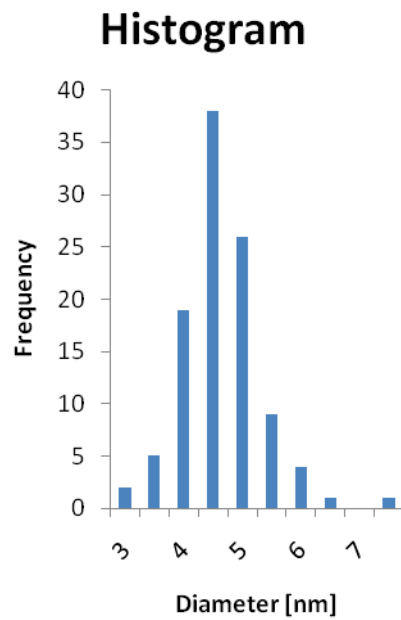

**Figure S4b.** TEM image of randomly mixed Au-DPT<sub>0.35</sub>DMOT<sub>0.65</sub> ( $D=4.42\pm 0.70$ )

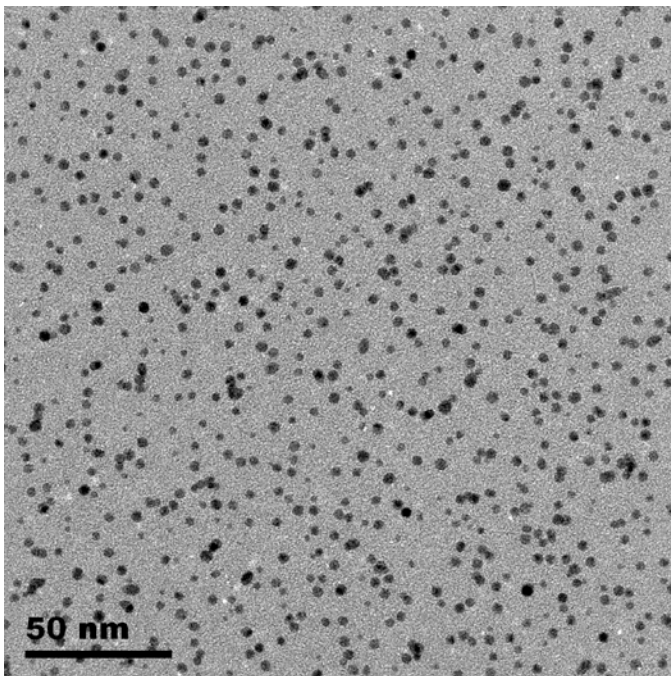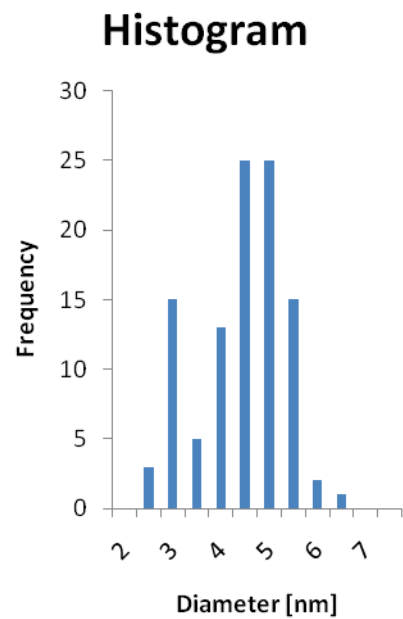

**Figure S4c.** TEM image of randomly mixed Au-DPT<sub>0.46</sub>DMOT<sub>0.54</sub> (4.17+/-0.89)

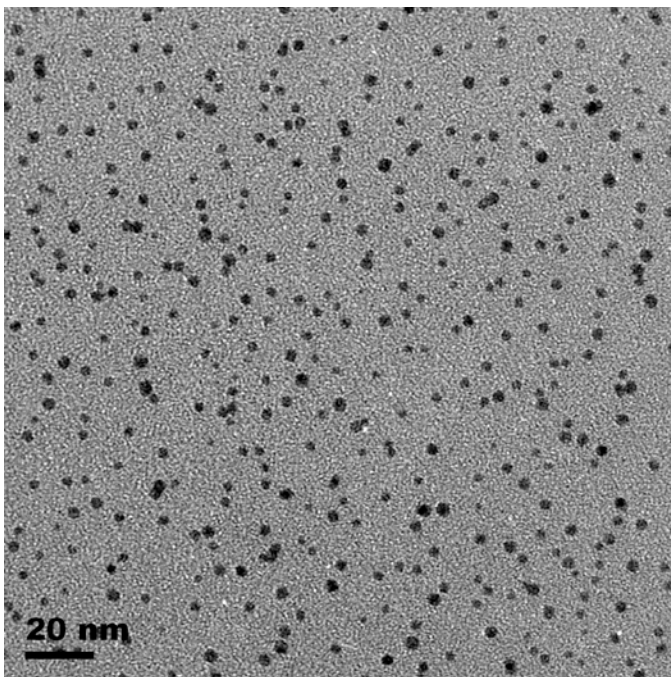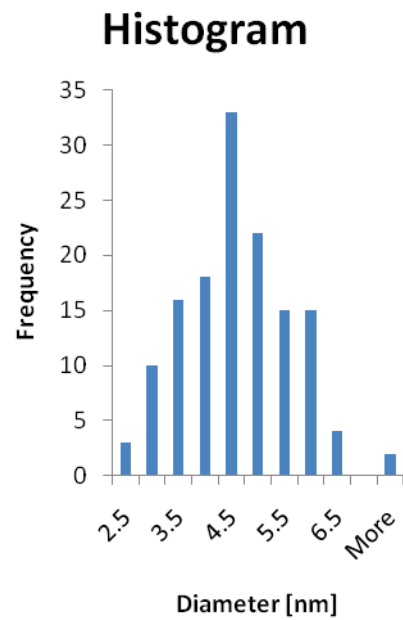

**Figure S4d.** TEM image of randomly mixed Au-DPT<sub>0.60</sub>DMOT<sub>0.40</sub> (D=4.41±1.01)

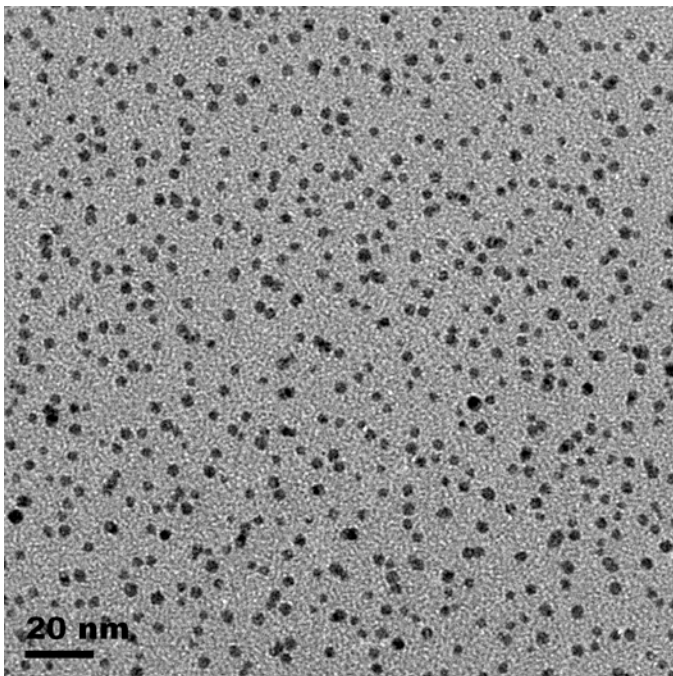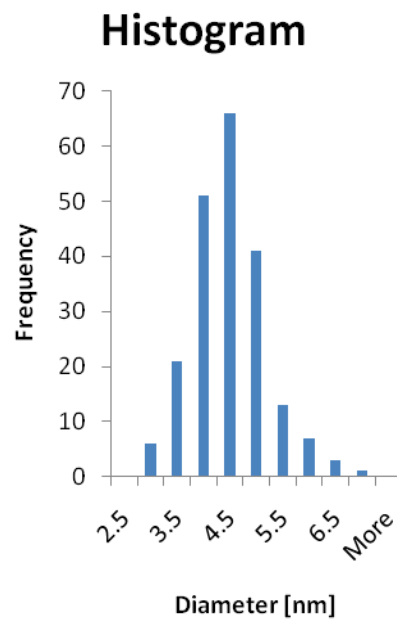

Figure S4e. TEM image of randomly mixed Au-DPT<sub>0.71</sub>DMOT<sub>0.29</sub> (4.24+/-0.69)

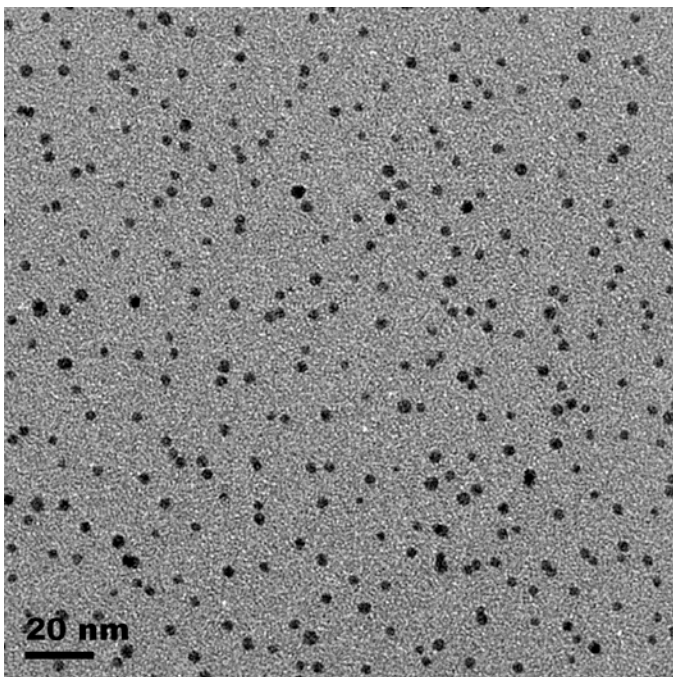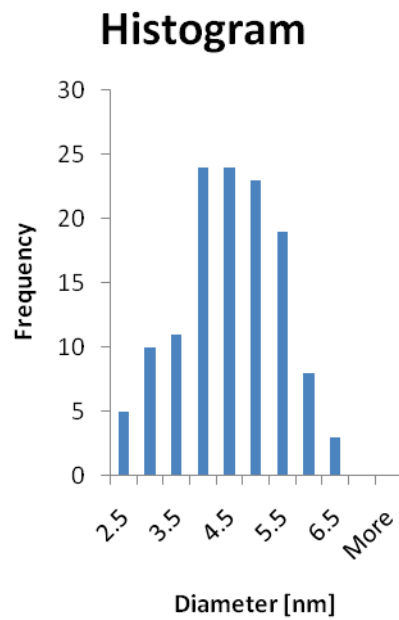

Figure S4f. TEM image of randomly mixed Au-DPT<sub>0.82</sub>DMOT<sub>0.18</sub> (D=4.14±0.99)

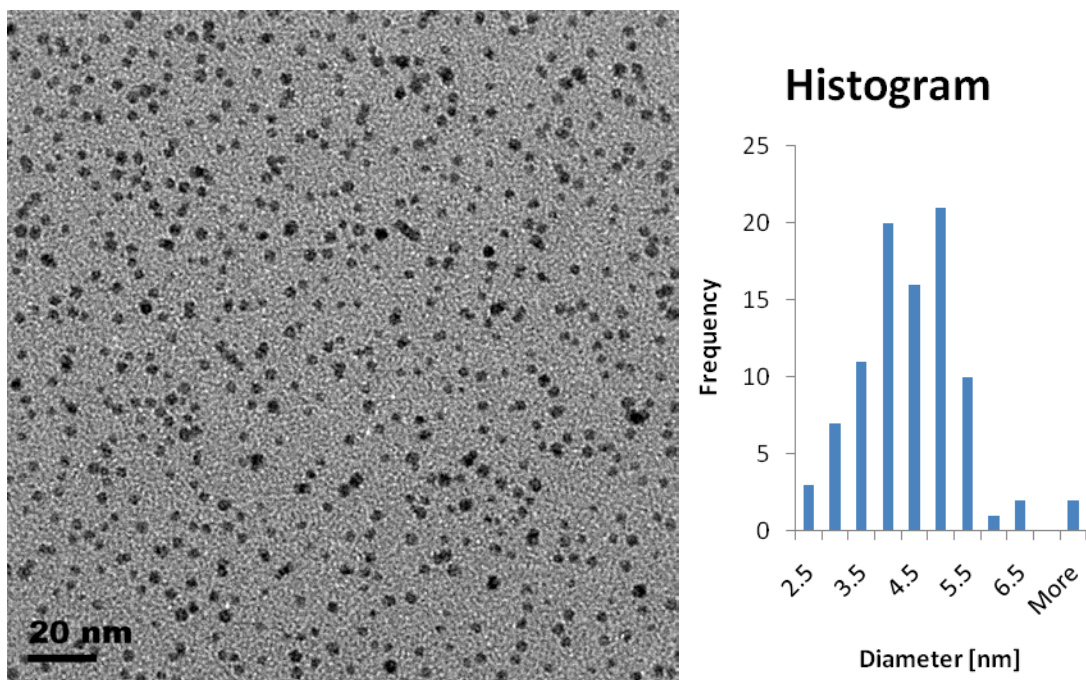

Figure S4g. TEM image of randomly mixed Au-DPT<sub>0.93</sub>DMOT<sub>0.07</sub> ( $D=4.20\pm 0.96$ )

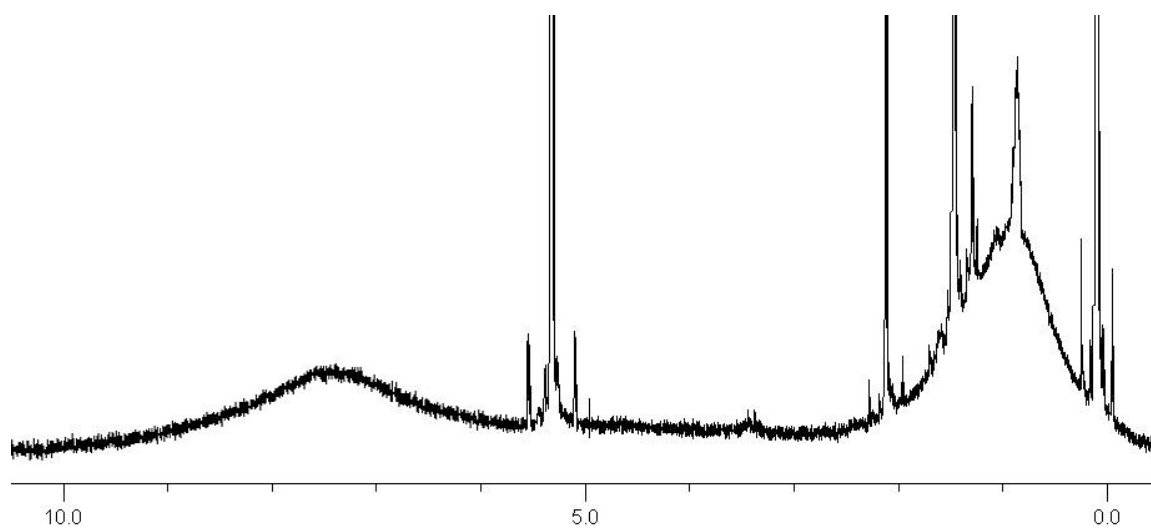

Figure S5a. <sup>1</sup>H NMR of randomly mixed Au-DPT<sub>0.22</sub>DMOT<sub>0.78</sub>

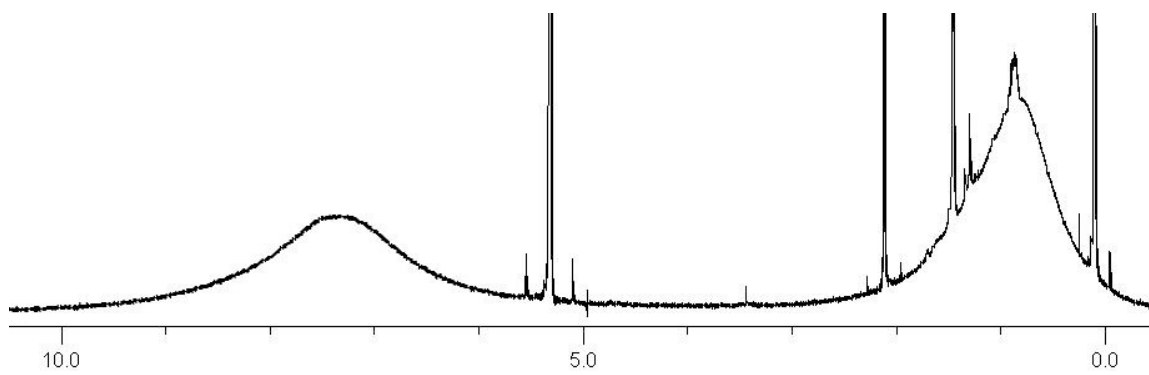

**Figure S5b.** <sup>1</sup>H NMR of randomly mixed Au-DPT<sub>0.35</sub>DMOT<sub>0.65</sub>

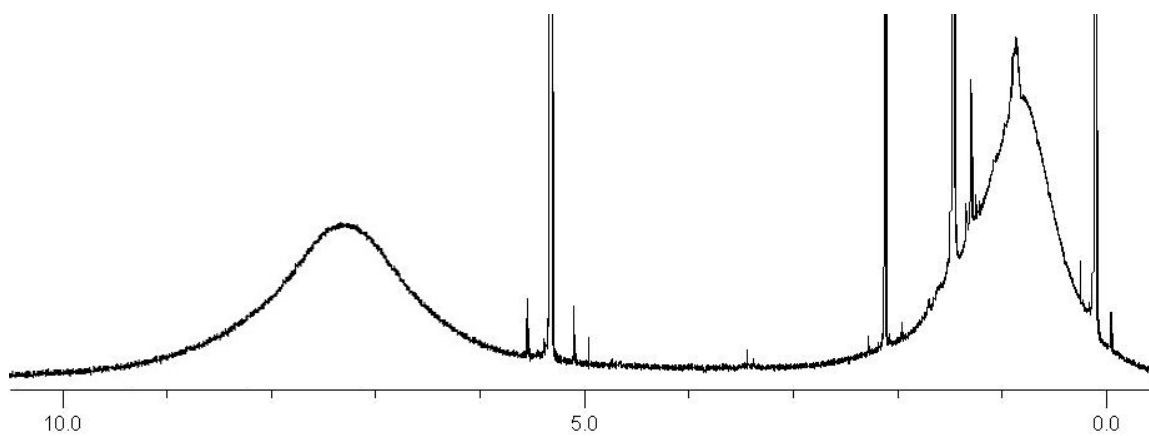

**Figure S5c.** <sup>1</sup>H NMR of randomly mixed Au-DPT<sub>0.46</sub>DMOT<sub>0.54</sub>

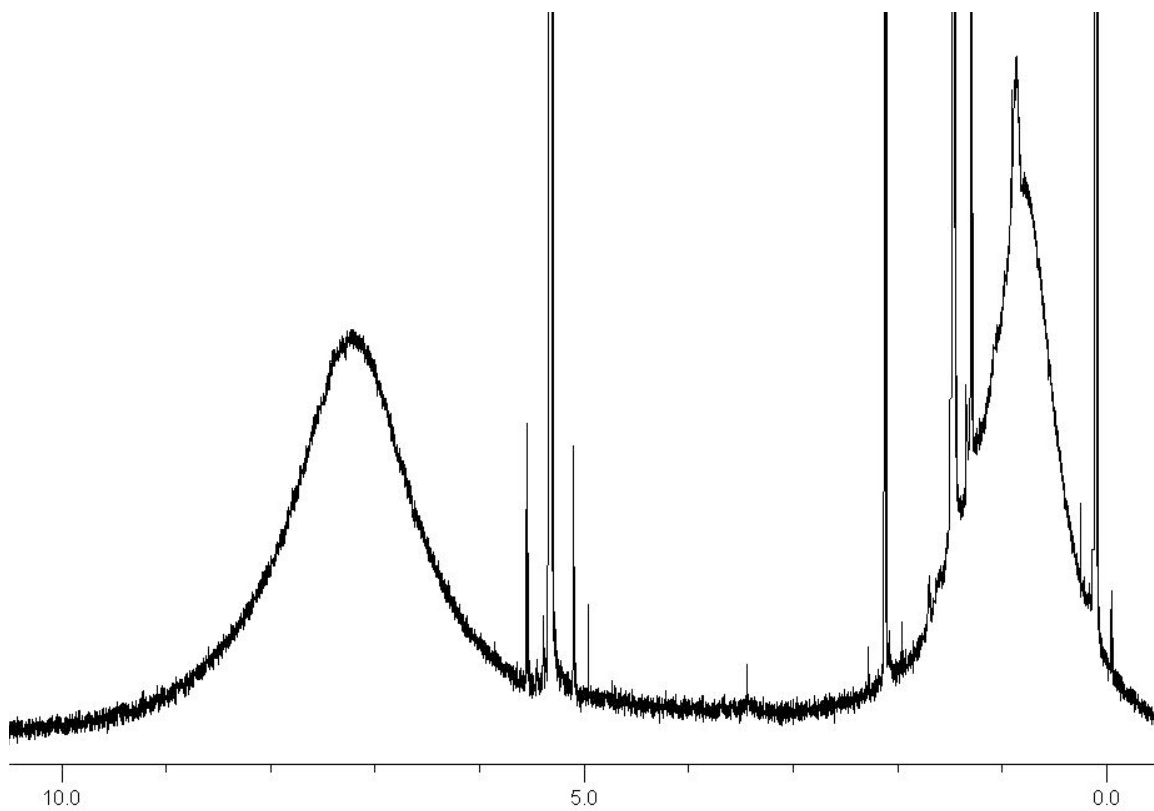

**Figure S5d.**  $^1\text{H}$  NMR of randomly mixed Au-DPT<sub>0.60</sub>DMOT<sub>0.40</sub>

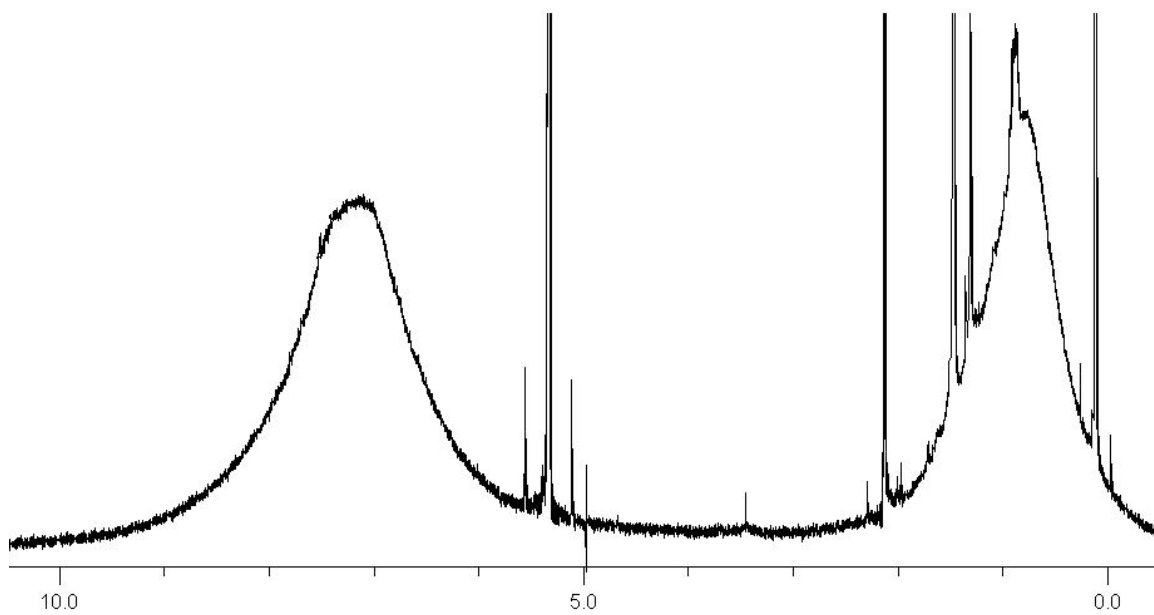

**Figure S5e.**  $^1\text{H}$  NMR of randomly mixed Au-DPT<sub>0.71</sub>DMOT<sub>0.29</sub>



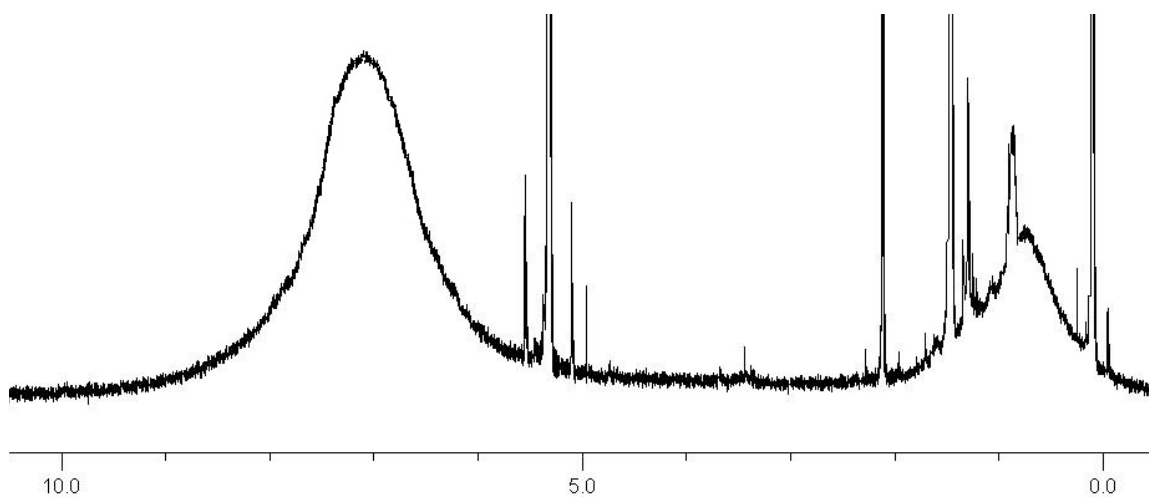

**Figure S5f.** <sup>1</sup>H NMR of randomly mixed Au-DPT<sub>0.82</sub>DMOT<sub>0.18</sub>

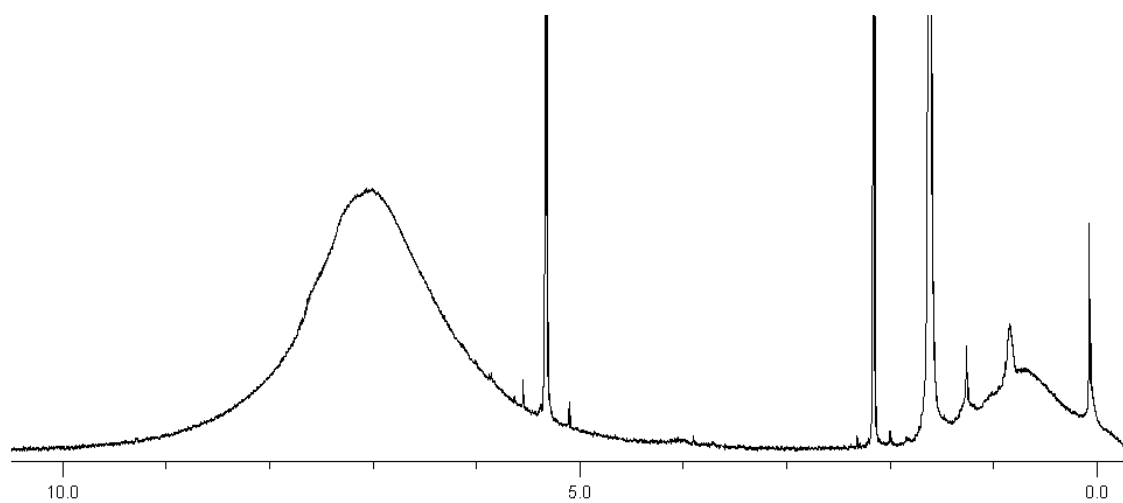

**Figure S5g.** <sup>1</sup>H NMR of randomly mixed Au-DPT<sub>0.93</sub>DMOT<sub>0.07</sub>

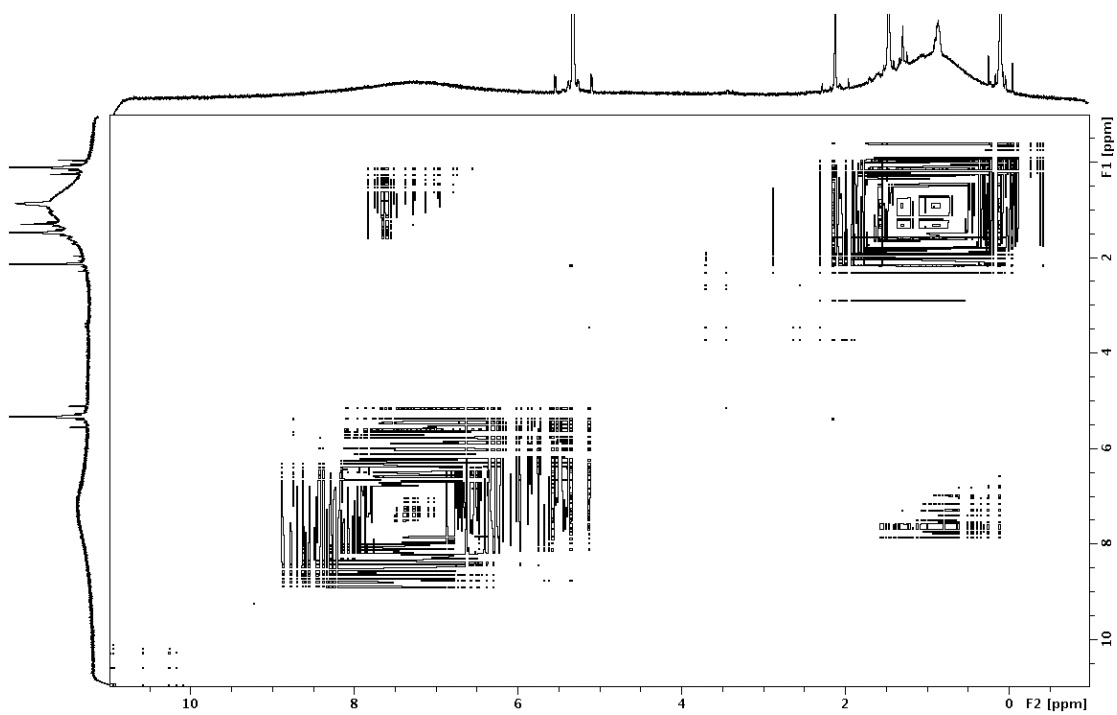

**Figure S6a.** NOESY of randomly mixed Au-DPT<sub>0.22</sub>DMOT<sub>0.78</sub>

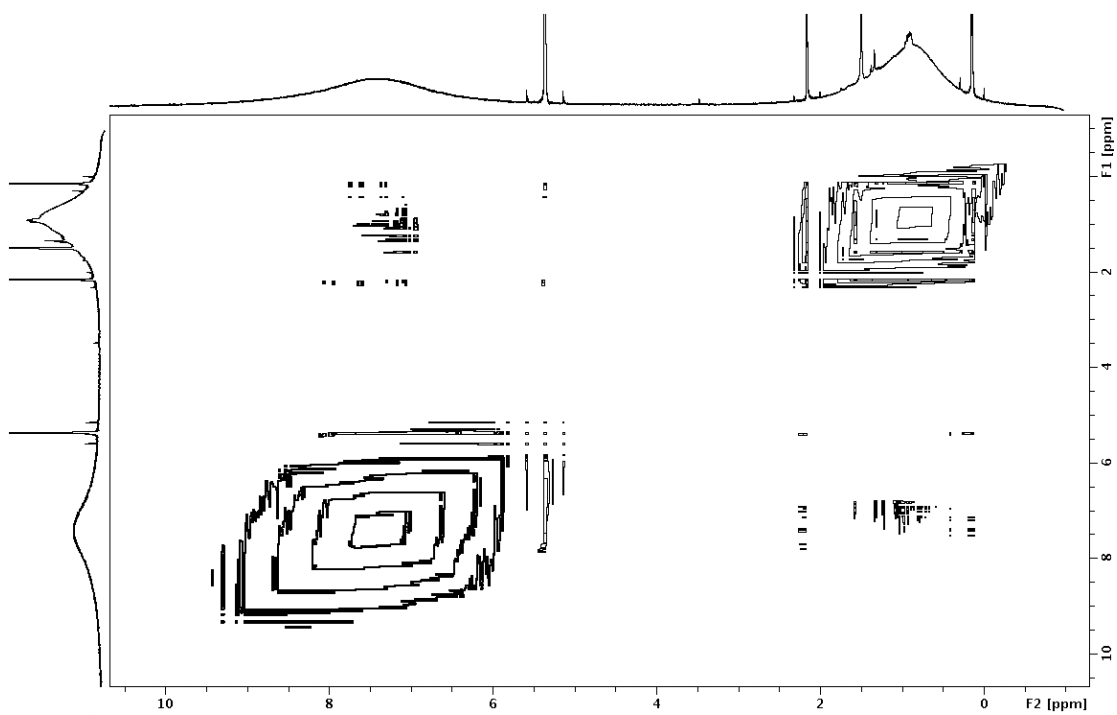

**Figure S6b.** NOESY of randomly mixed Au-DPT<sub>0.32</sub>DMOT<sub>0.68</sub>

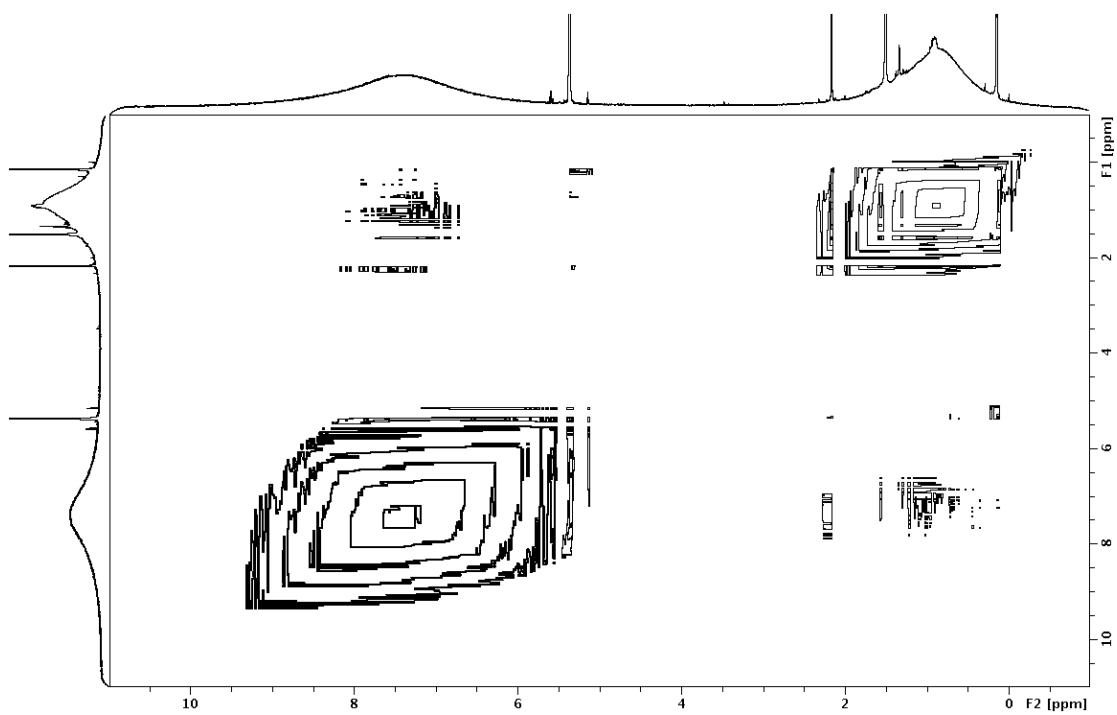

**Figure S6c.** NOESY of randomly mixed Au-DPT<sub>0.40</sub>DMOT<sub>0.60</sub>

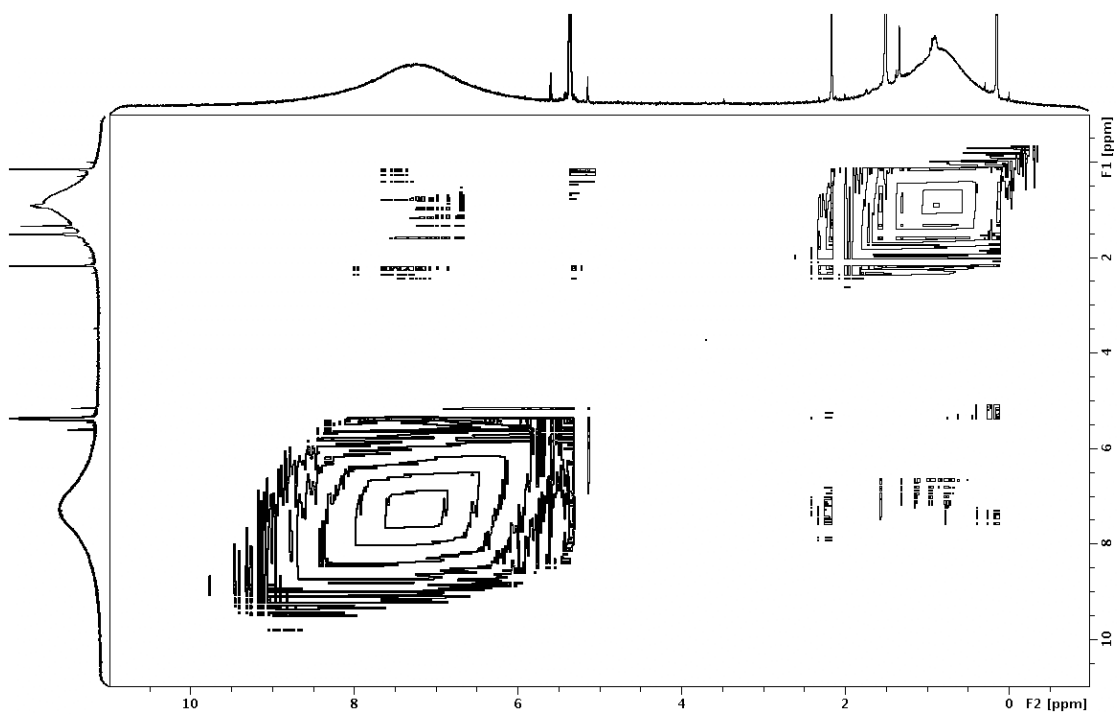

**Figure S6d.** NOESY of randomly mixed Au-DPT<sub>0.60</sub>DMOT<sub>0.40</sub>

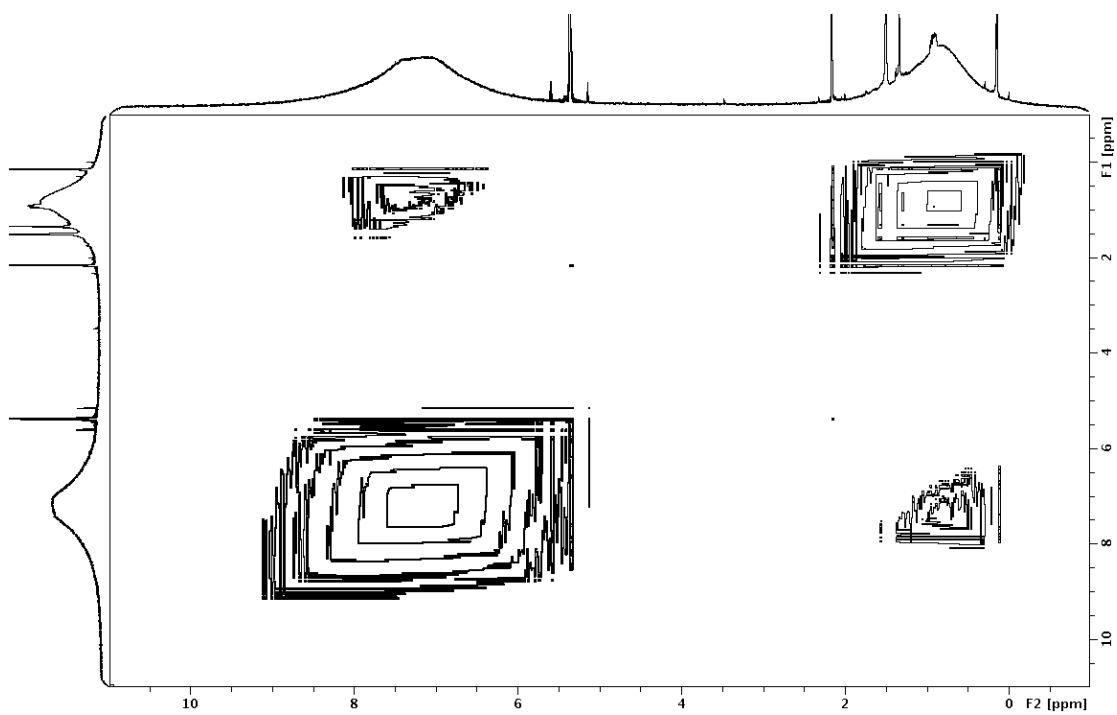

**Figure S6e.** NOESY of randomly mixed Au-DPT<sub>0.71</sub>DMOT<sub>0.29</sub>

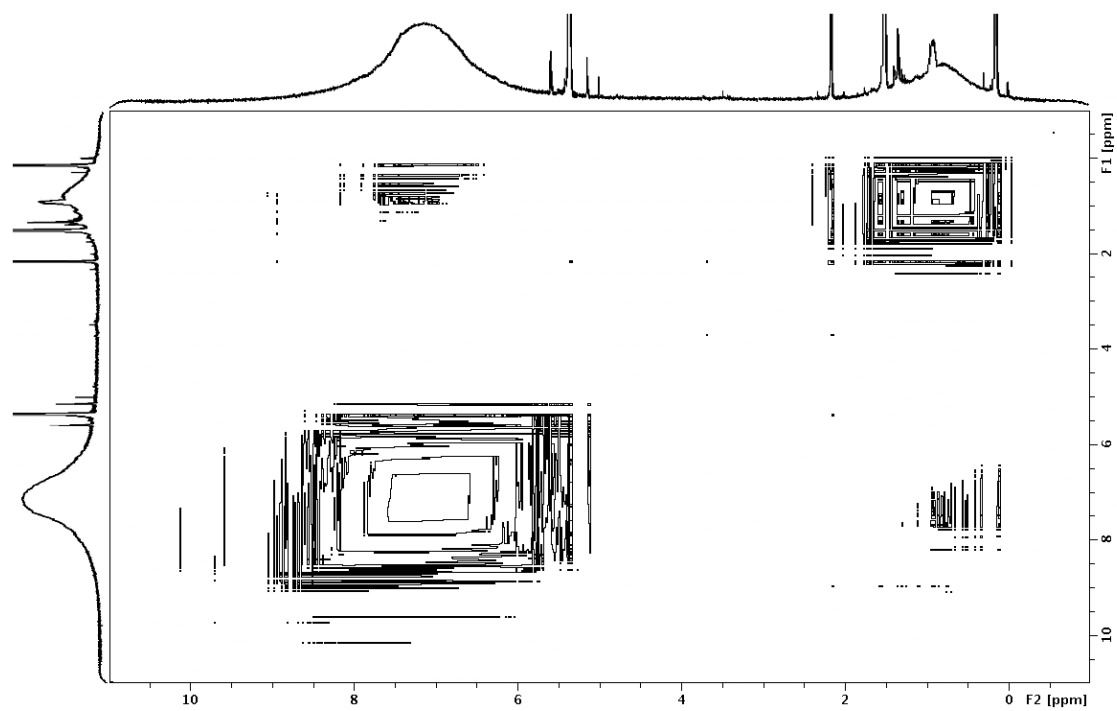

**Figure S6f.** NOESY of randomly mixed Au-DPT<sub>0.82</sub>DMOT<sub>0.18</sub>

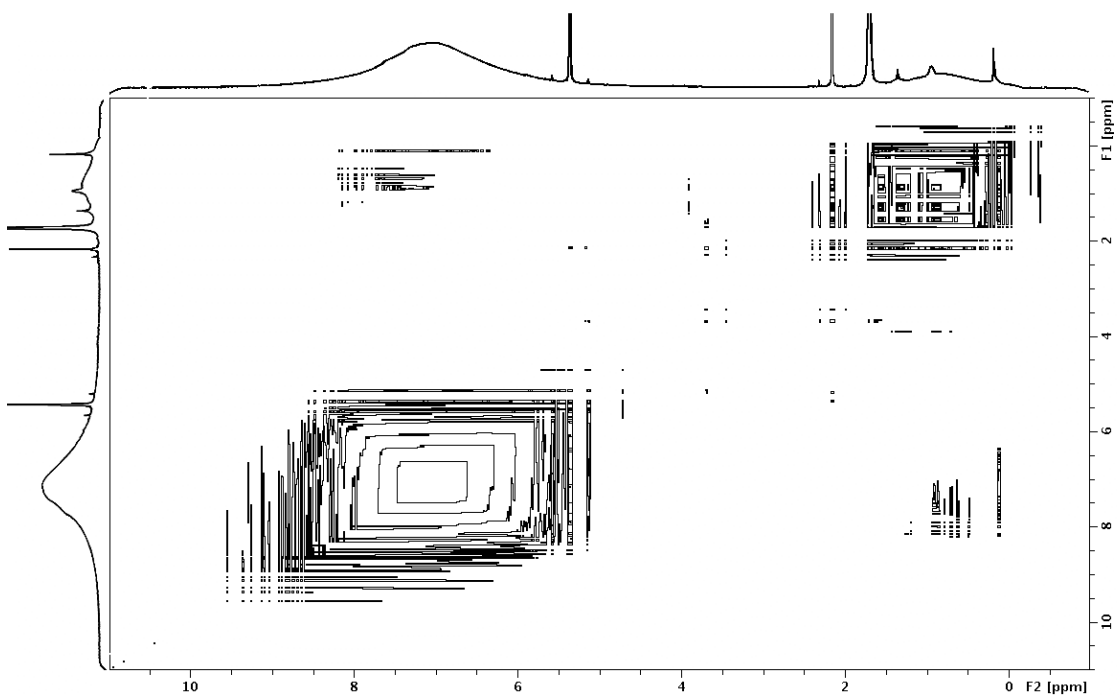

**Figure S6g.** NOESY of randomly mixed Au-DPT<sub>0.93</sub>DMOT<sub>0.07</sub>

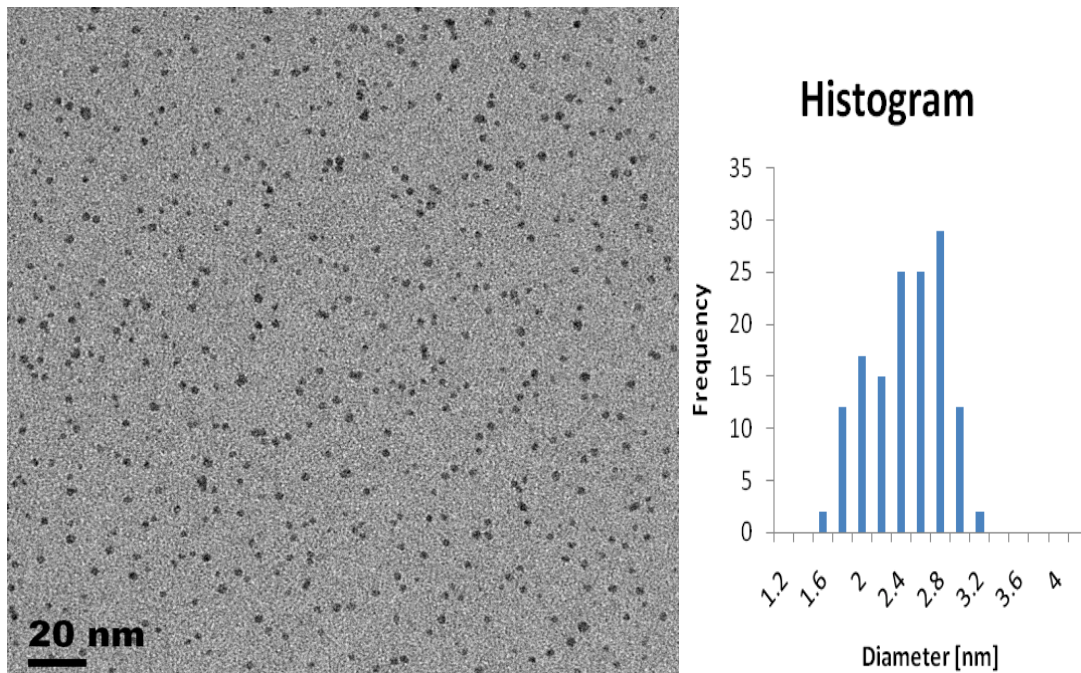

**Figure S7a.** TEM image of Janus Au-DPT<sub>0.10</sub>DDT<sub>0.90</sub> (2.36 ± 0.38 nm)

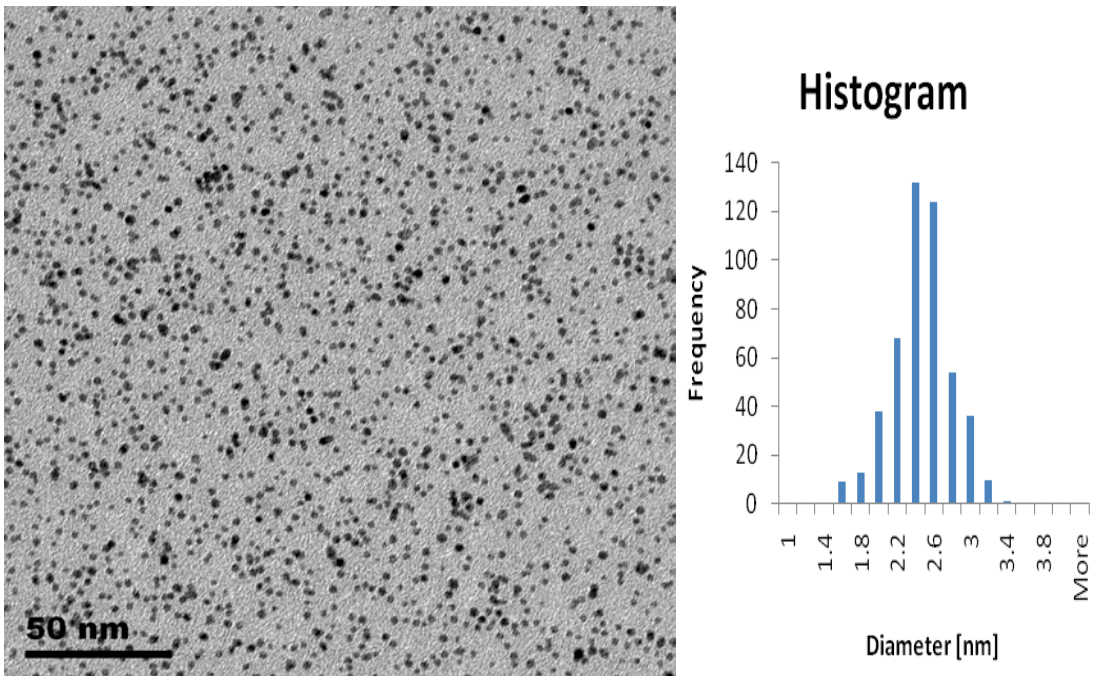

**Figure S7b.** TEM image of Janus Au-DPT<sub>0.19</sub>DDT<sub>0.81</sub> (2.39 +/- 0.32 nm)

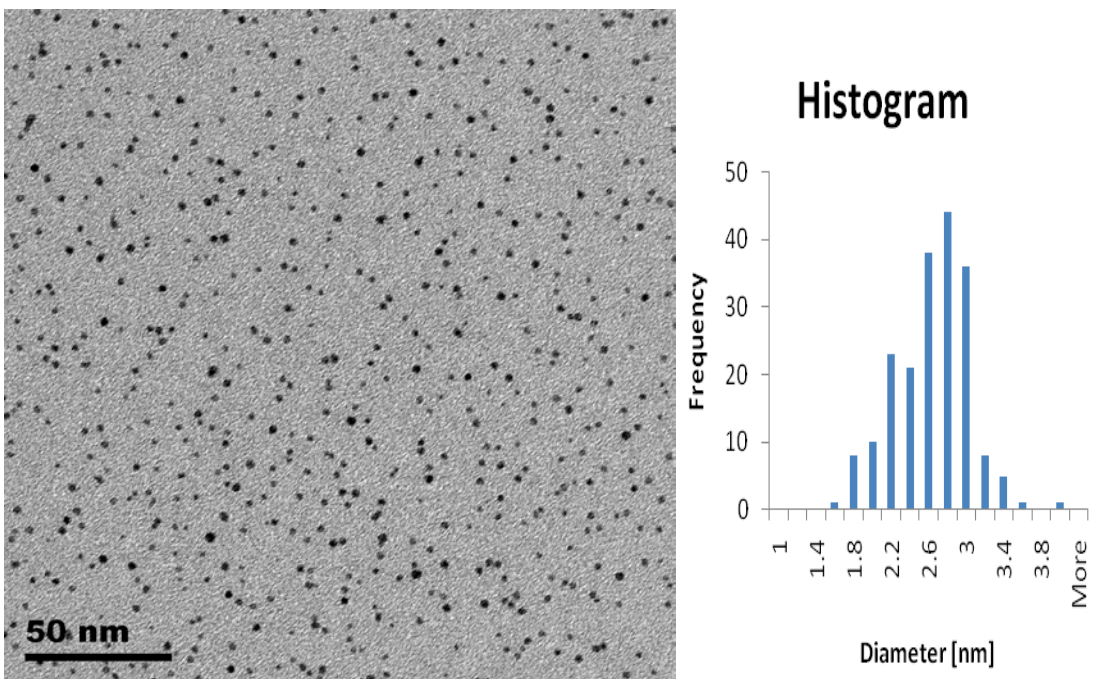

**Figure S7c.** TEM image of Janus Au-DPT<sub>0.28</sub>DDT<sub>0.72</sub> (2.55 +/- 0.39)

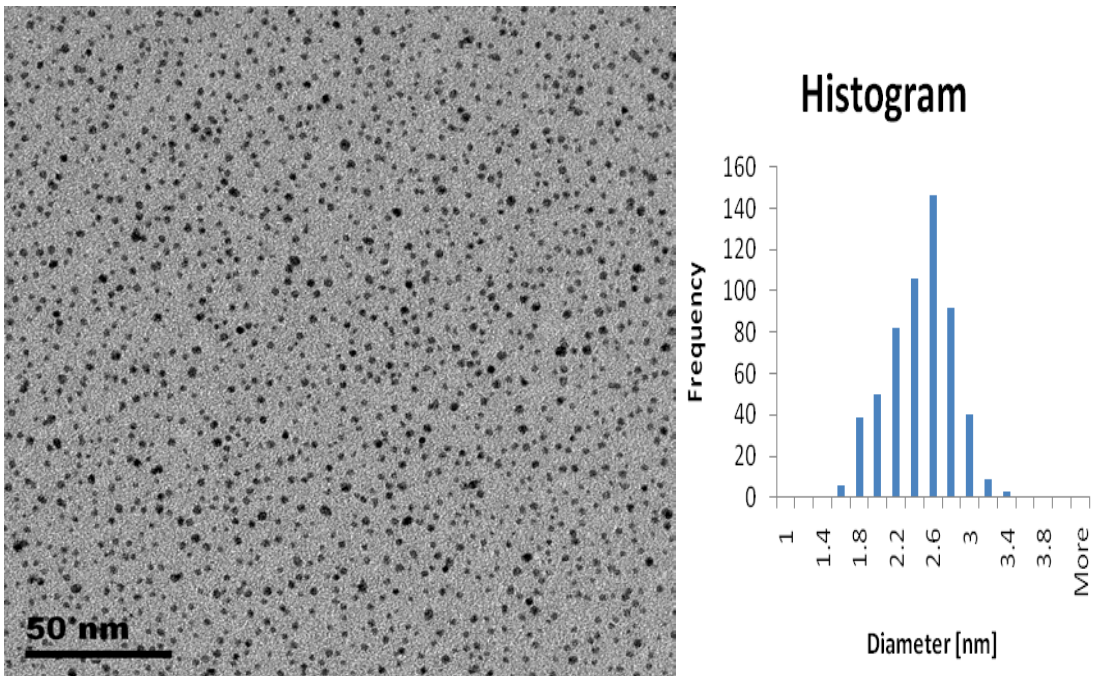

**Figure S7d.** TEM image of Janus Au-DPT<sub>0.41</sub>DDT<sub>0.59</sub> (2.38±0.35)

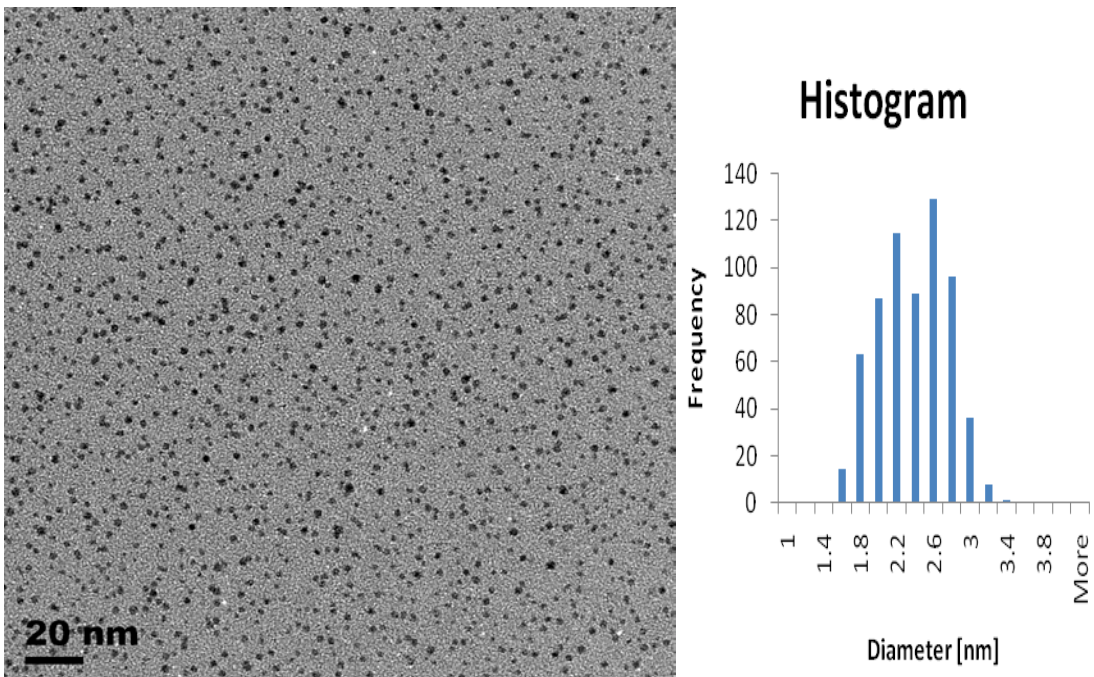

**Figure S7e.** TEM image of Janus Au-DPT<sub>0.56</sub>DDT<sub>0.44</sub> (2.28 ± 0.36 nm)

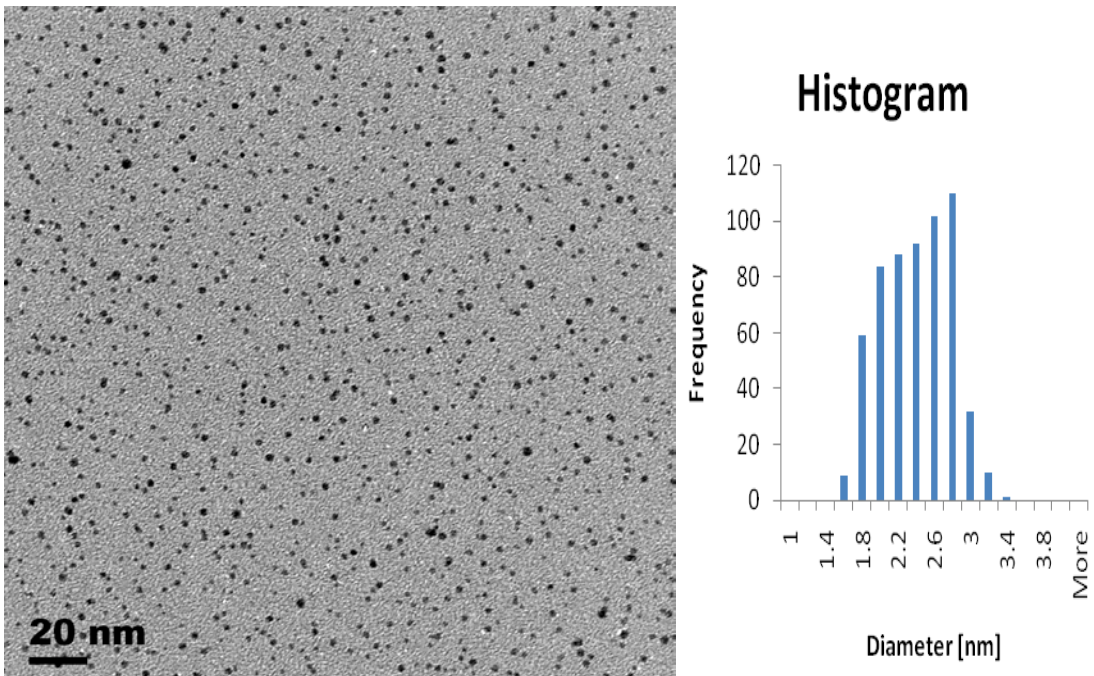

**Figure S7f.** TEM image of Janus Au-DPT<sub>0.70</sub>DDT<sub>0.30</sub> (2.30±0.37)

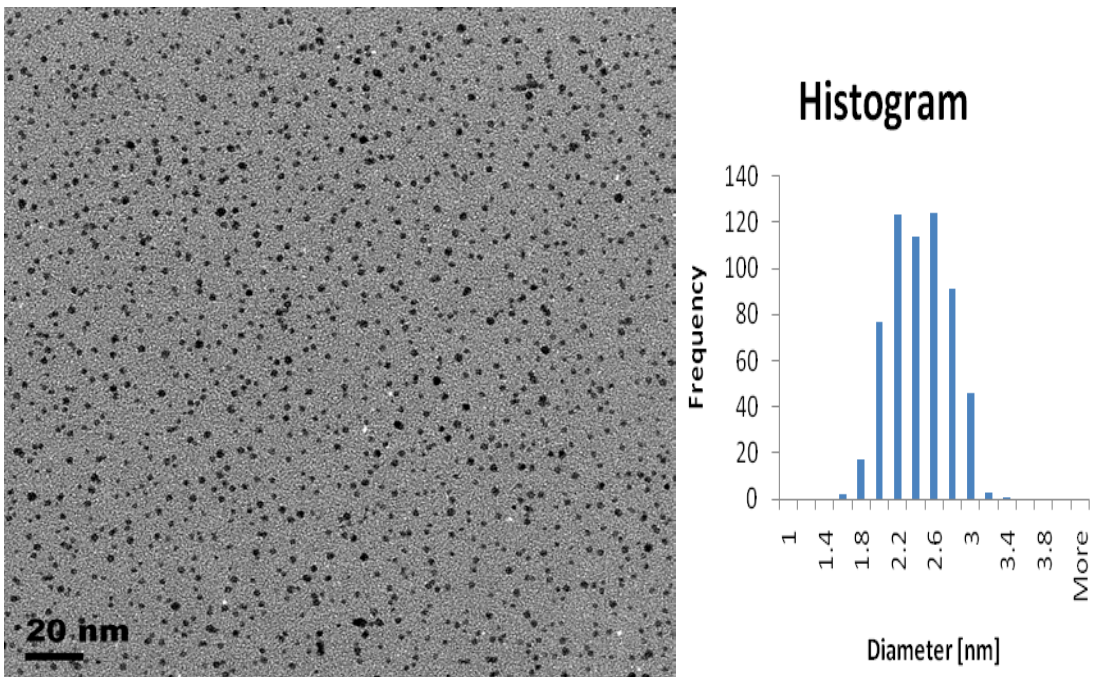

**Figure S7g.** TEM image of Janus Au-DPT<sub>0.82</sub>DDT<sub>0.18</sub> (2.33±0.33 nm)



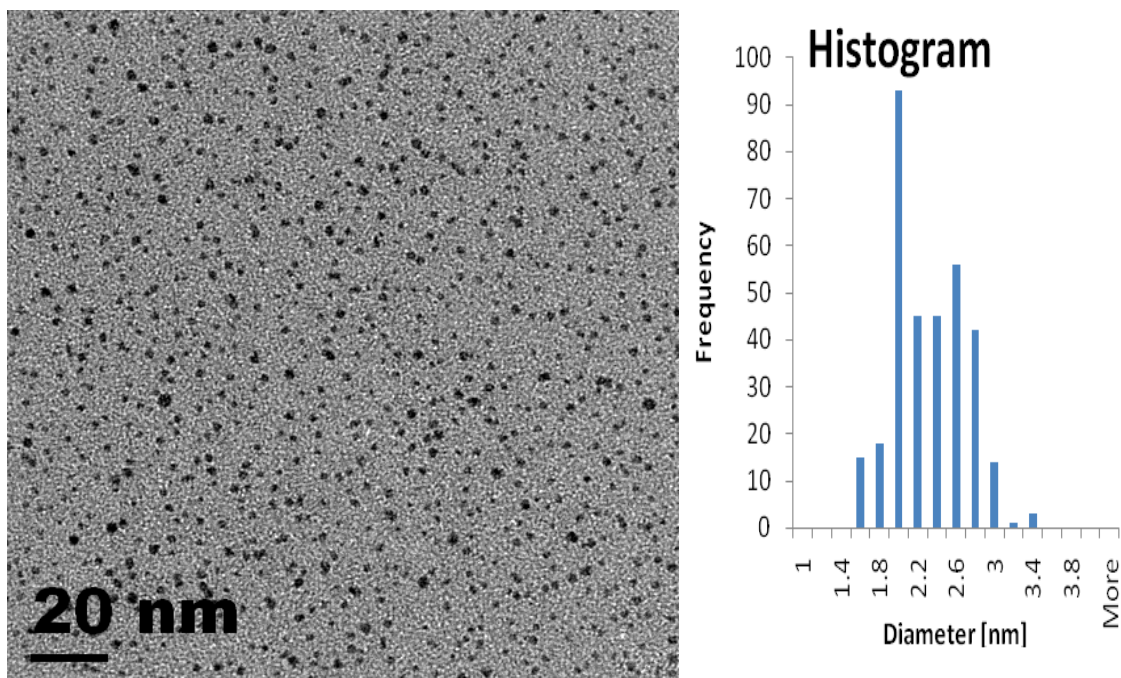

**Figure S7h.** TEM image of  $\sim 2$  nm Au-DPT ( $2.20 \pm 0.37$ )

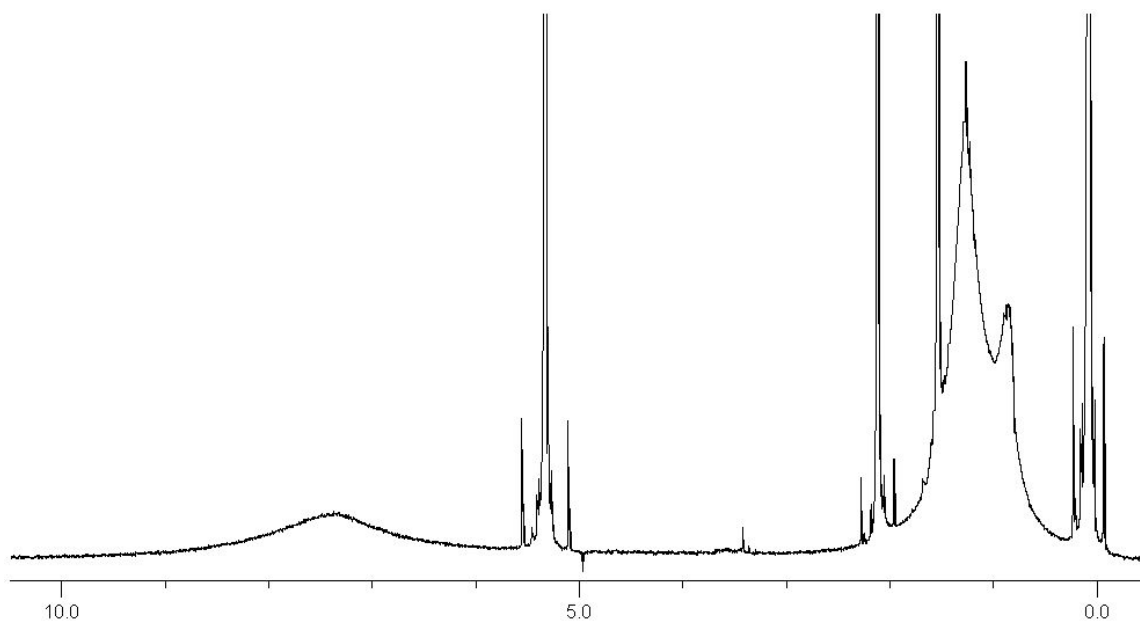

**Figure S8a.**  $^1\text{H}$  NMR of Janus Au-DPT<sub>0.10</sub>DDT<sub>0.90</sub>

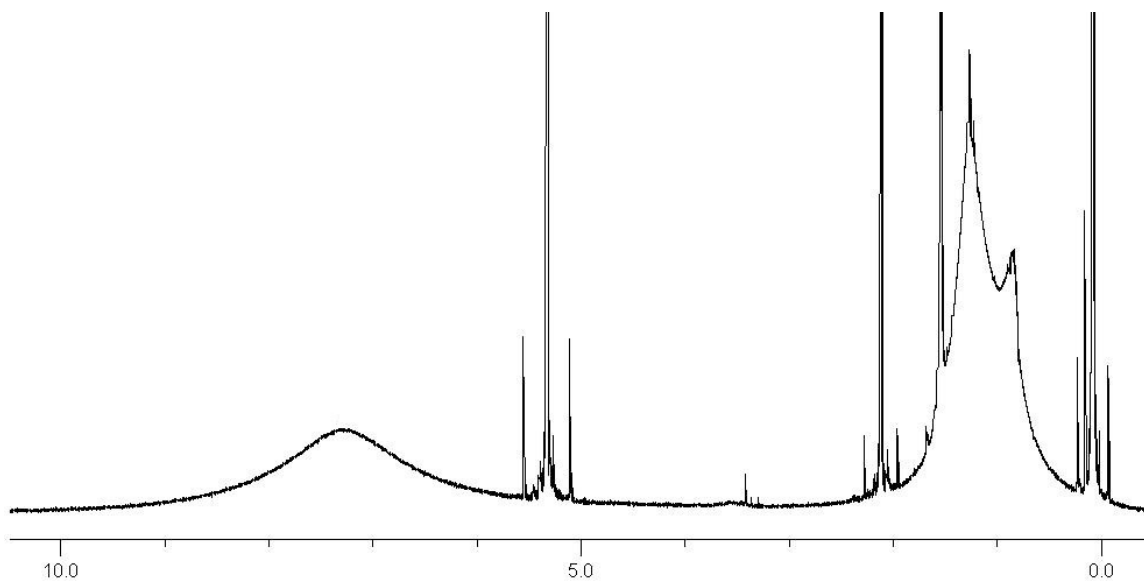

**Figure S8b.** <sup>1</sup>H NMR of Janus Au-DPT<sub>0.19</sub>DDT<sub>0.81</sub>

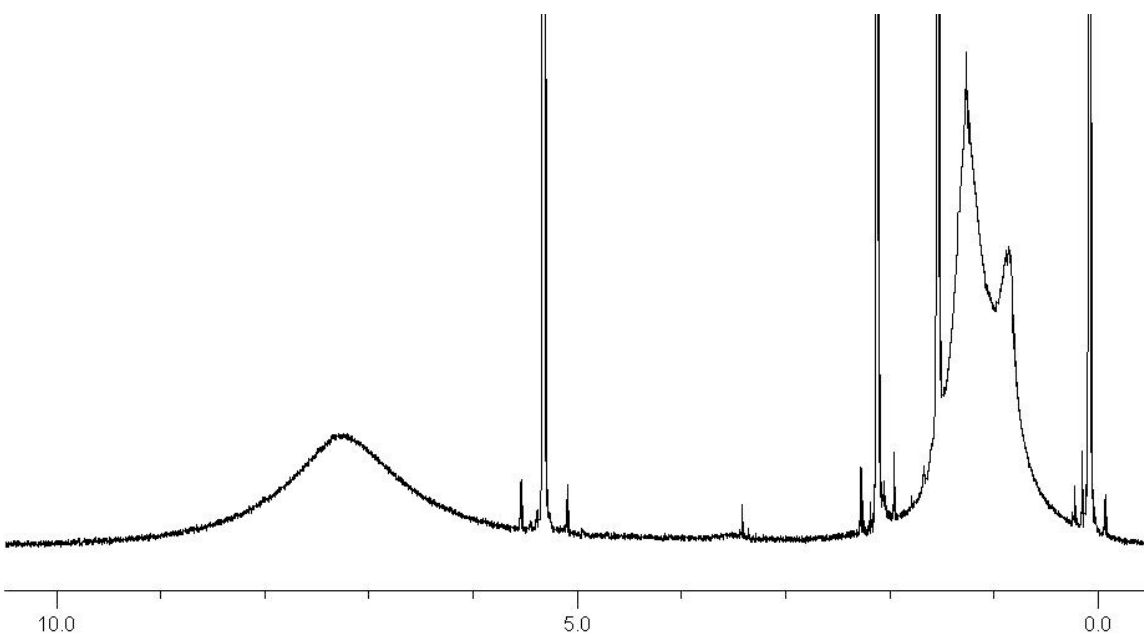

**Figure S8c.** <sup>1</sup>H NMR of Janus Au-DPT<sub>0.28</sub>DDT<sub>0.72</sub>

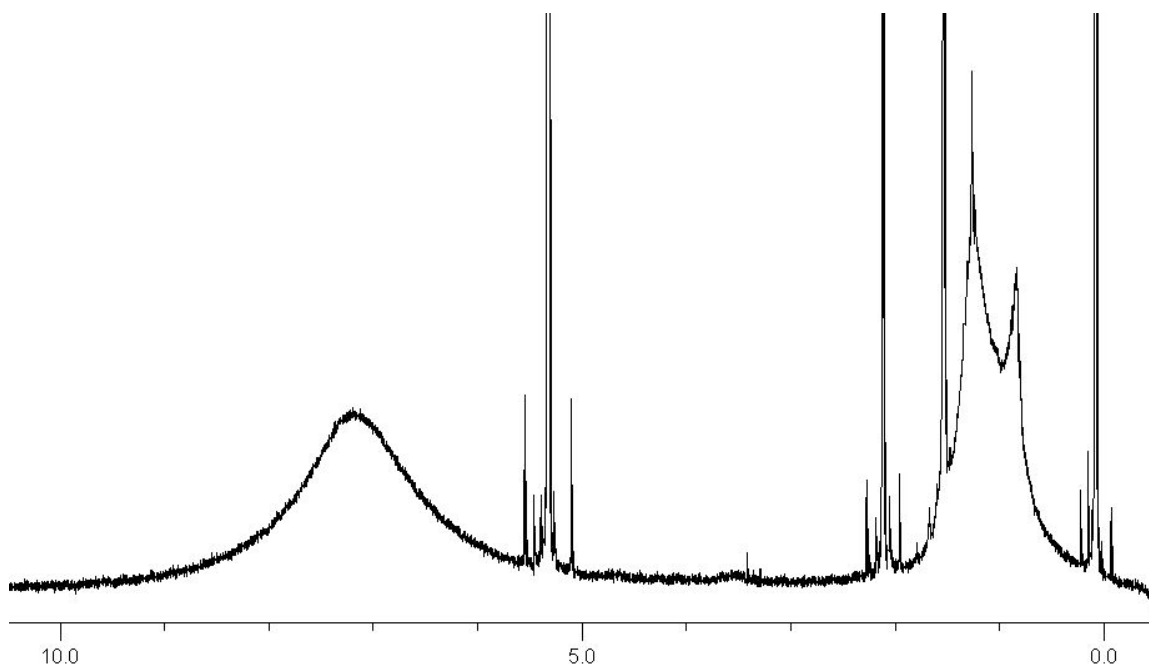

**Figure S8d.**  $^1\text{H}$  NMR of Janus Au-DPT<sub>0.41</sub>DDT<sub>0.59</sub>

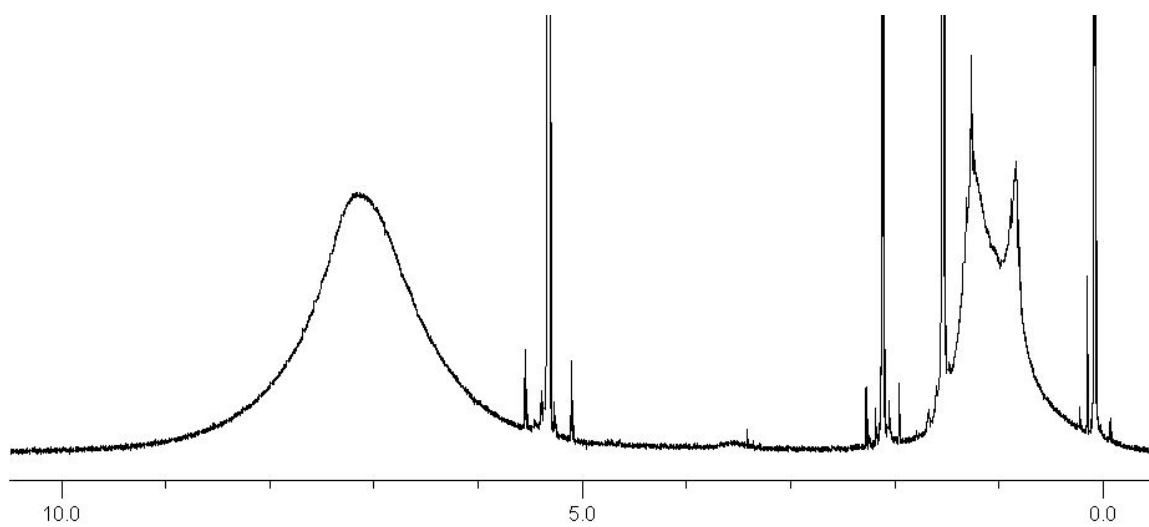

**Figure S8e.**  $^1\text{H}$  NMR of Janus Au-DPT<sub>0.56</sub>DDT<sub>0.44</sub>

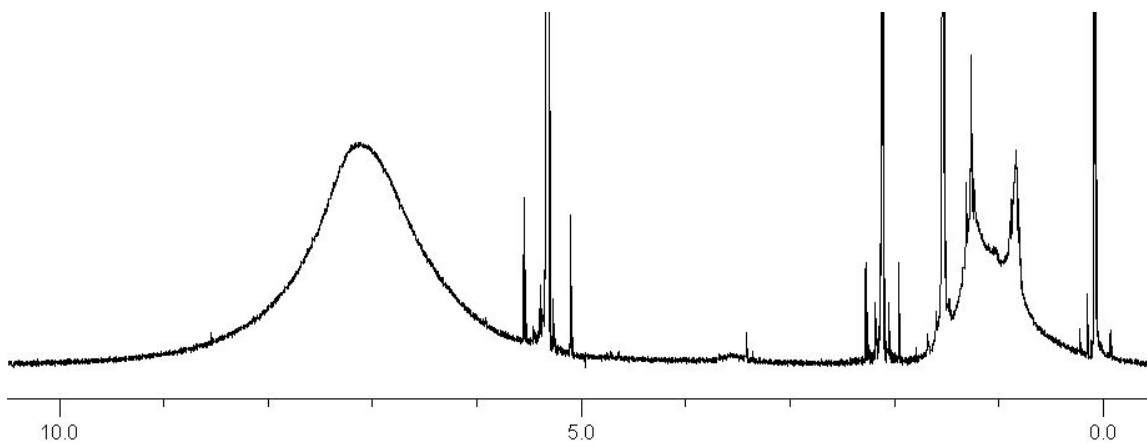

**Figure S8f.**  $^1\text{H}$  NMR of Janus Au-DPT<sub>0.70</sub>DDT<sub>0.30</sub>

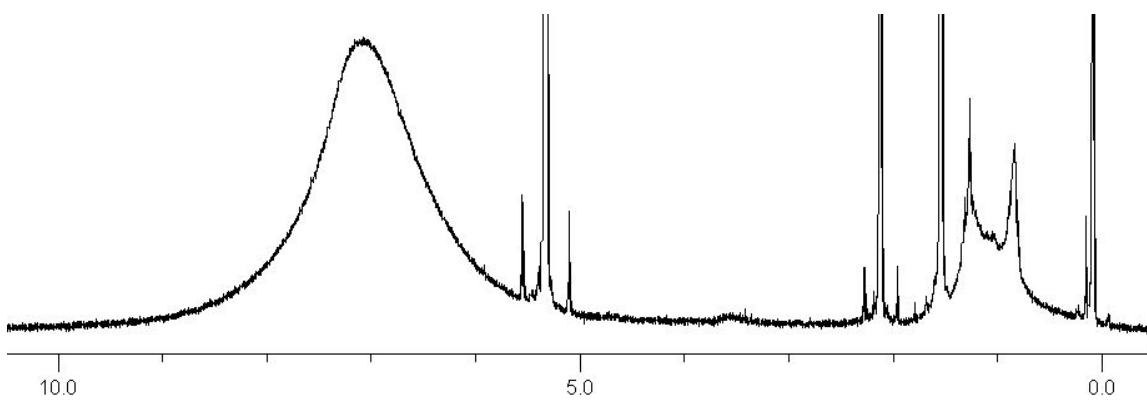

**Figure S8g.**  $^1\text{H}$  NMR of Janus Au-DPT<sub>0.82</sub>DDT<sub>0.18</sub>

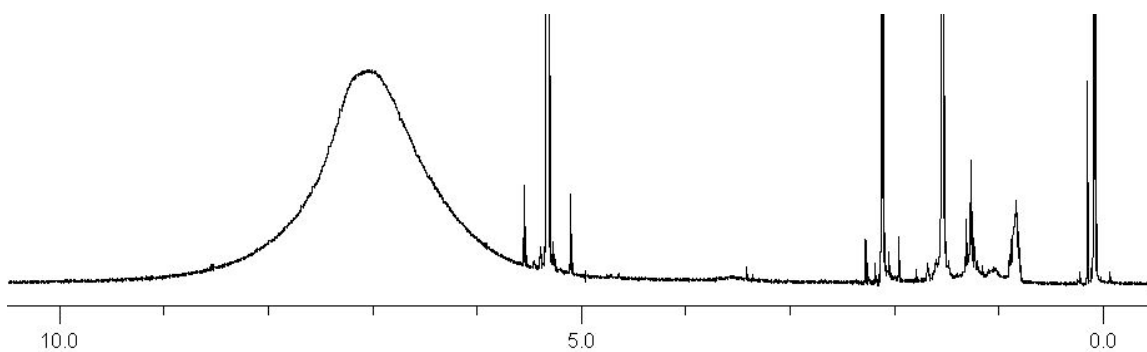

**Figure S8h.**  $^1\text{H}$  NMR of  $\sim 2$  nm Au-DPT this specific particles could contain some impurities, whose presence is irrelevant for the scope of this paper.

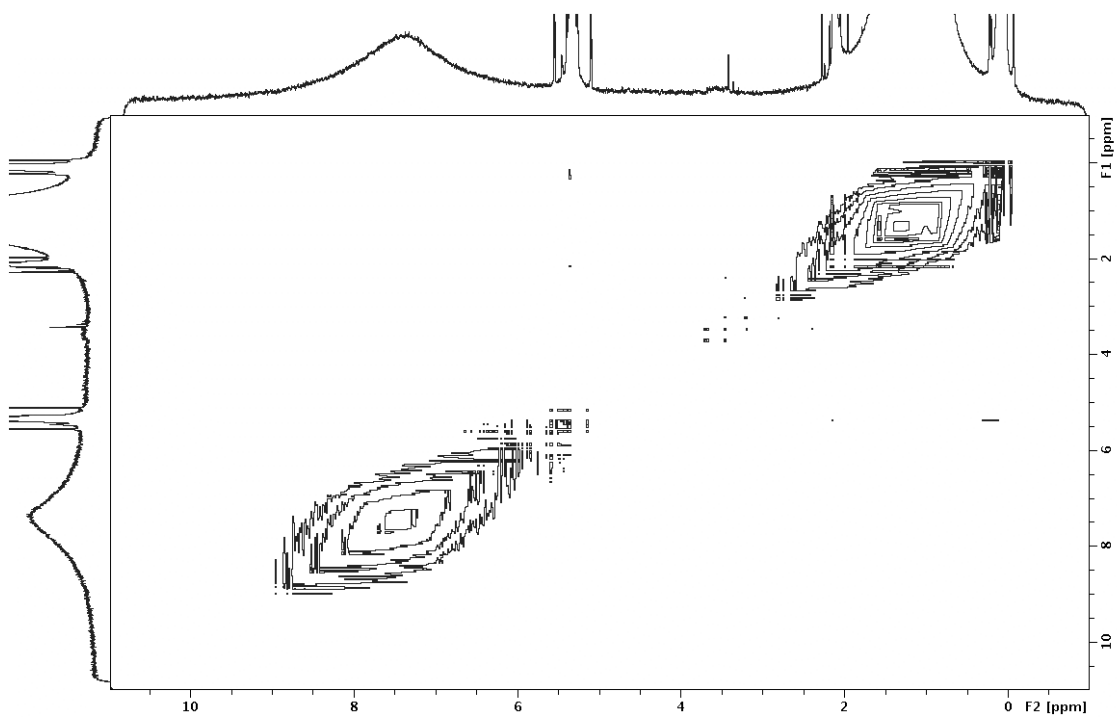

**Figure S9a.** NOESY of Janus Au-DPT<sub>0.10</sub>DDT<sub>0.90</sub>

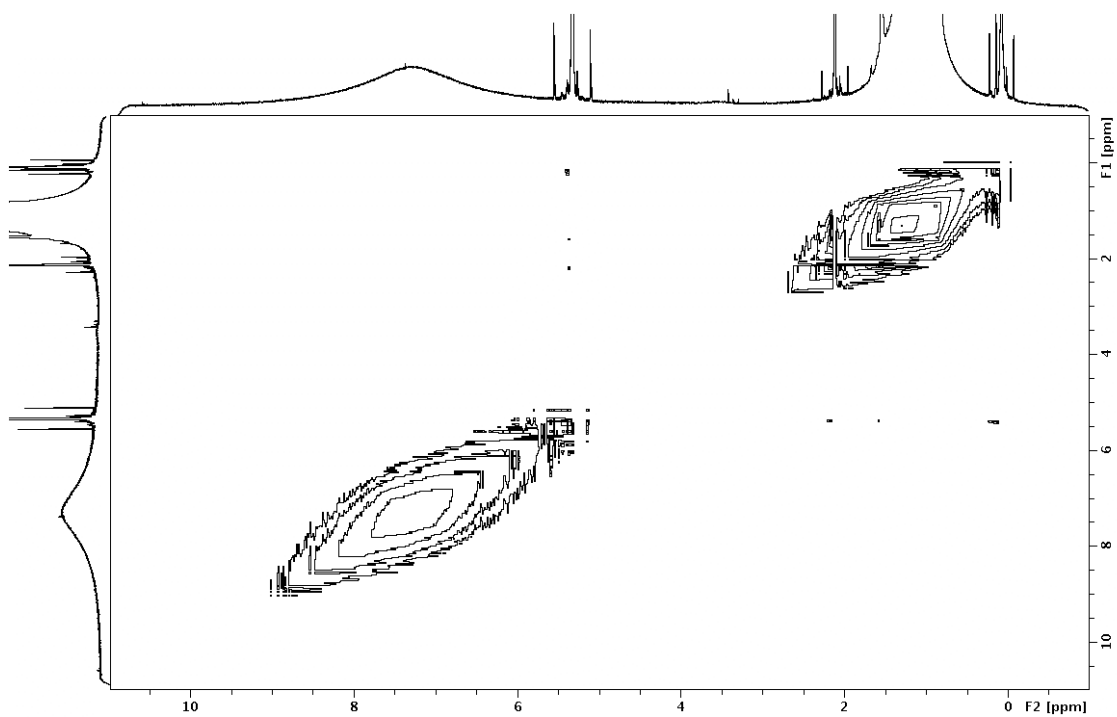

**Figure S9b.** NOESY of Janus Au-DPT<sub>0.19</sub>DDT<sub>0.81</sub>

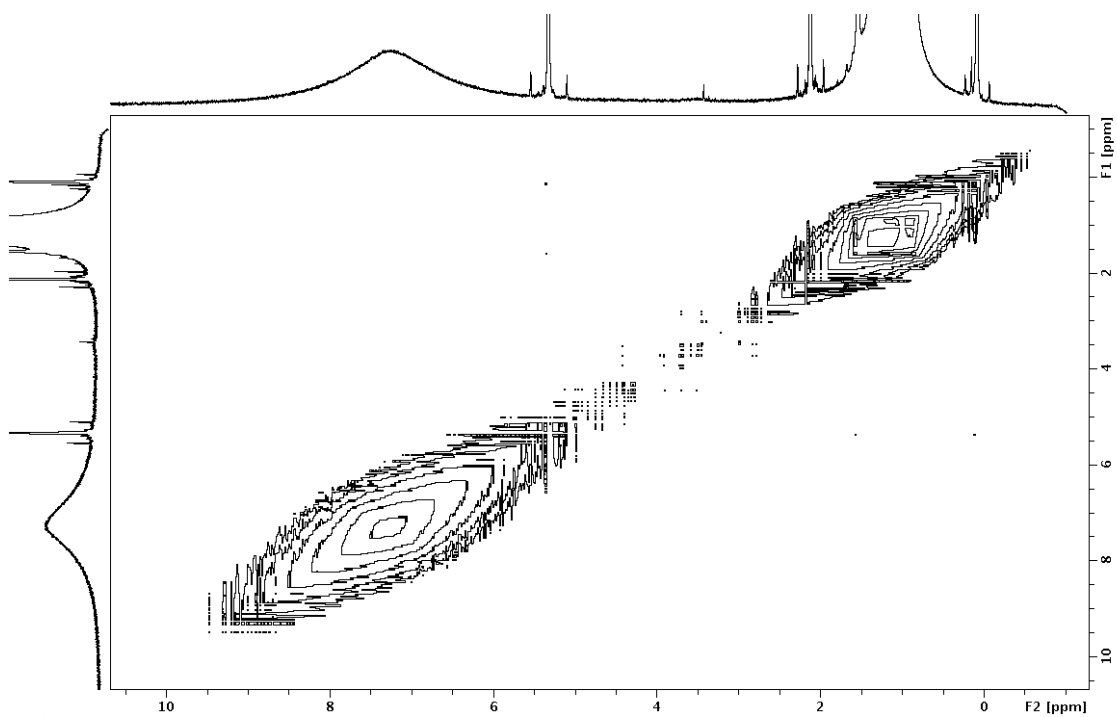

**Figure S9c.** NOESY of Janus Au-DPT<sub>0.28</sub>DDT<sub>0.72</sub>

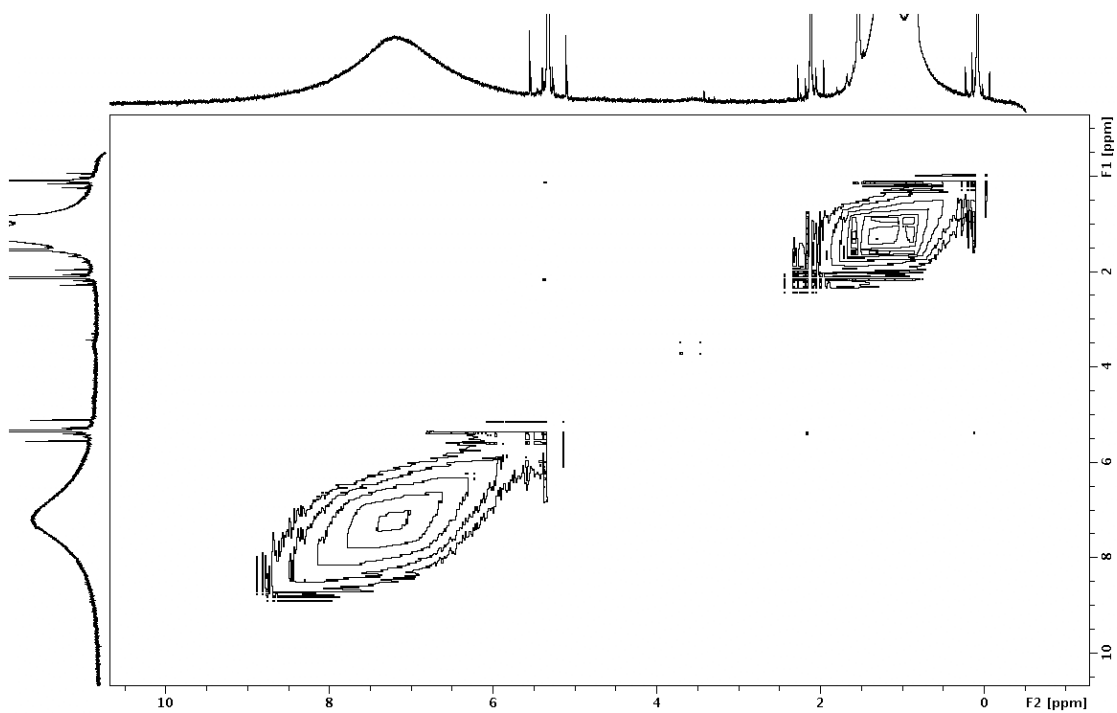

**Figure S9d.** NOESY of Janus Au-DPT<sub>0.41</sub>DDT<sub>0.59</sub>

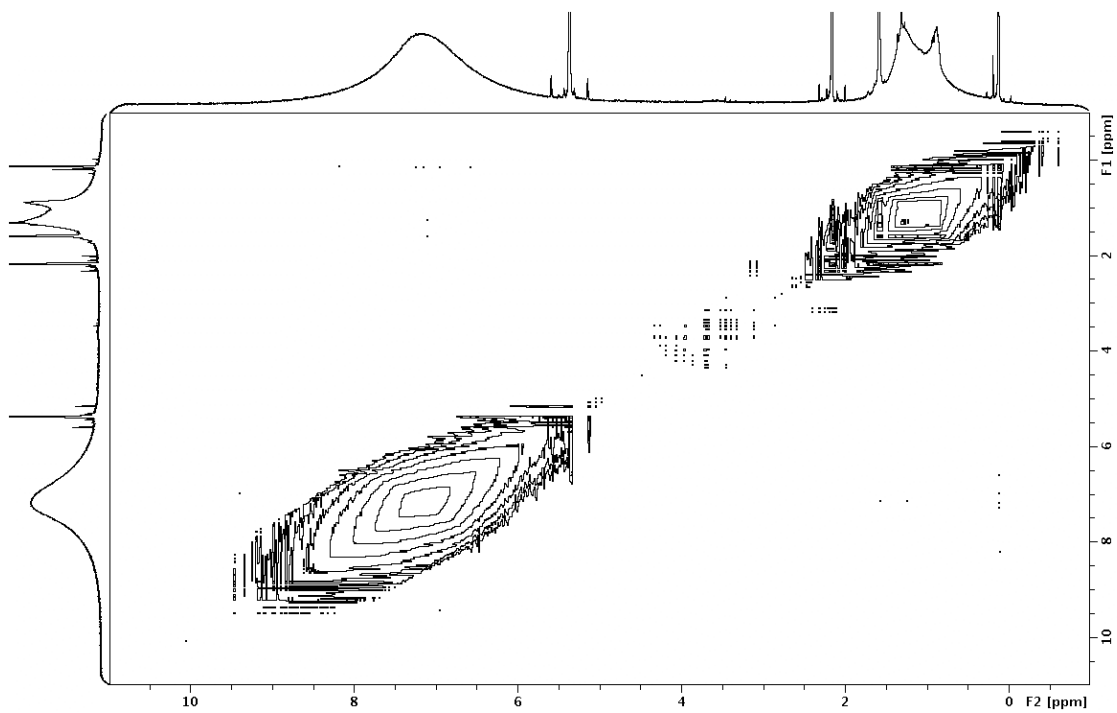

**Figure S9e.** NOESY of Janus Au-DPT<sub>0.56</sub>DDT<sub>0.44</sub>

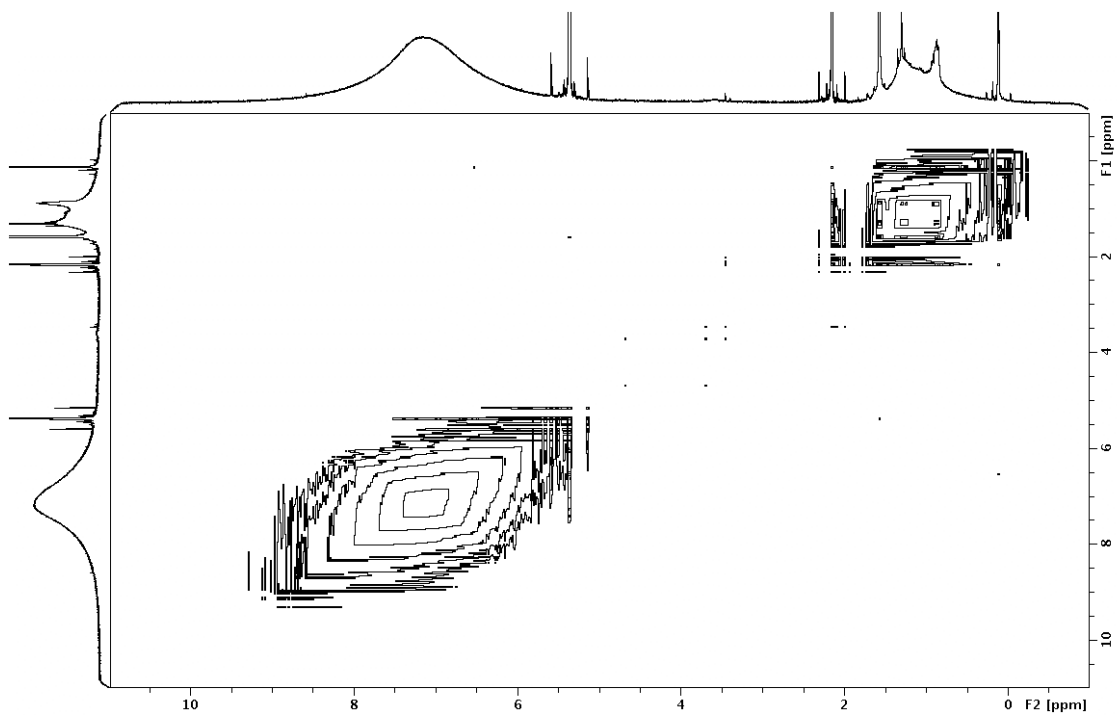

**Figure S9f.** NOESY of Janus Au-DPT<sub>0.70</sub>DDT<sub>0.30</sub>

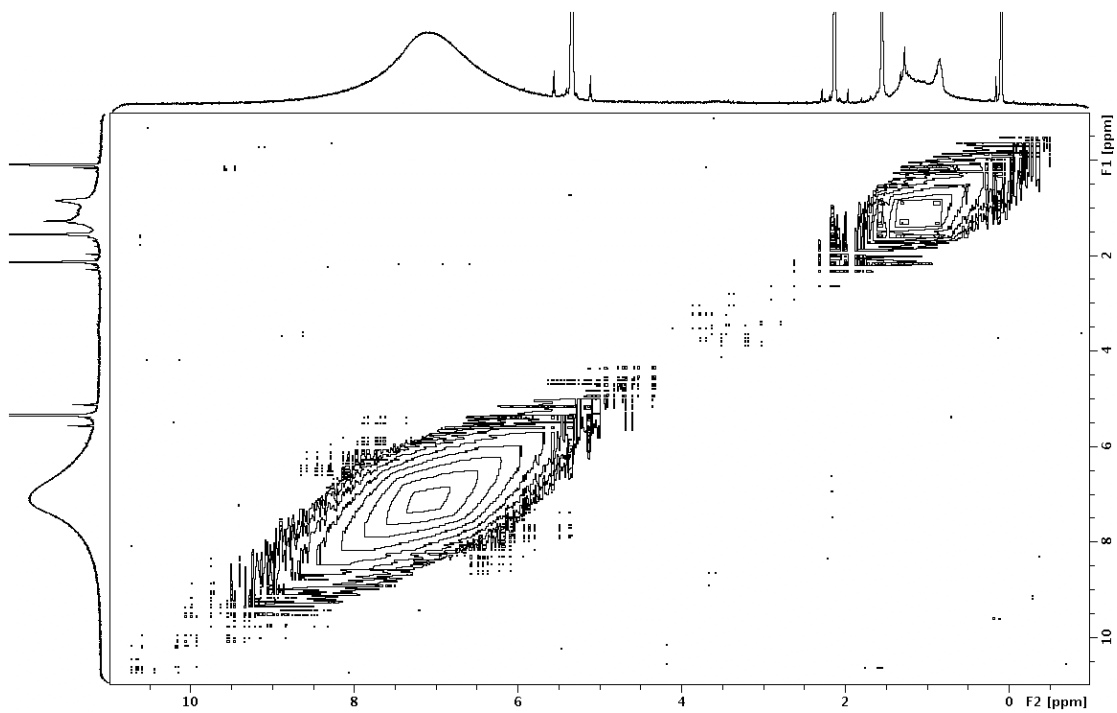

**Figure S9g.** NOESY of Janus Au-DPT<sub>0.82</sub>DDT<sub>0.18</sub>

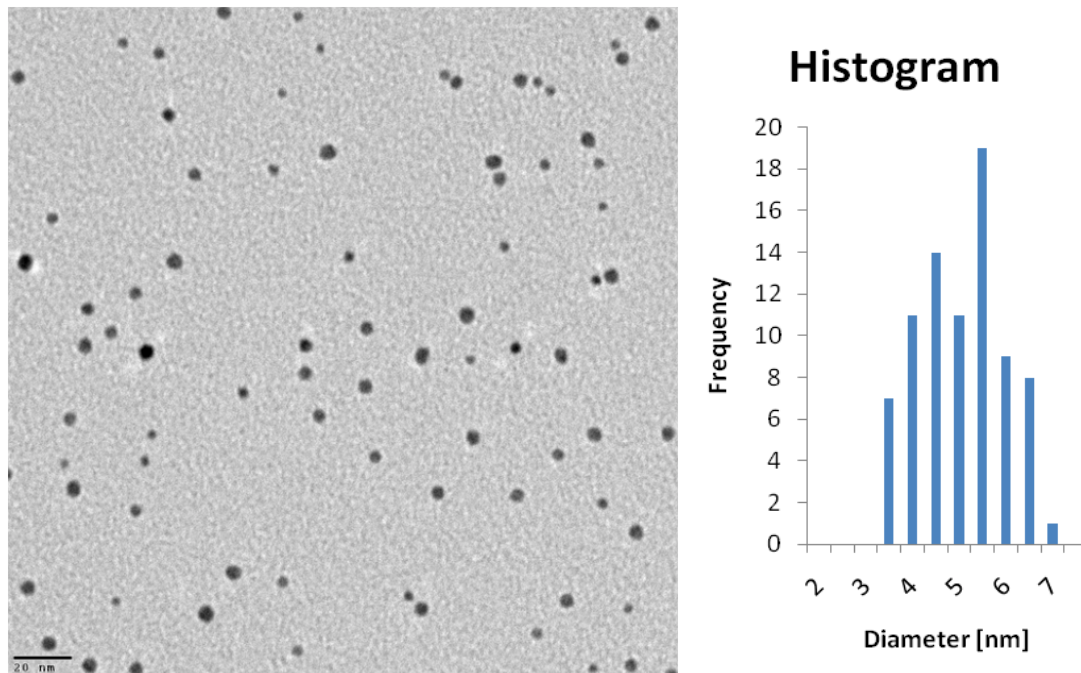

**Figure S10a.** TEM image of striped Au-DPT<sub>0.13</sub>DDT<sub>0.87</sub> ( $D=4.93\pm 0.91$  nm)



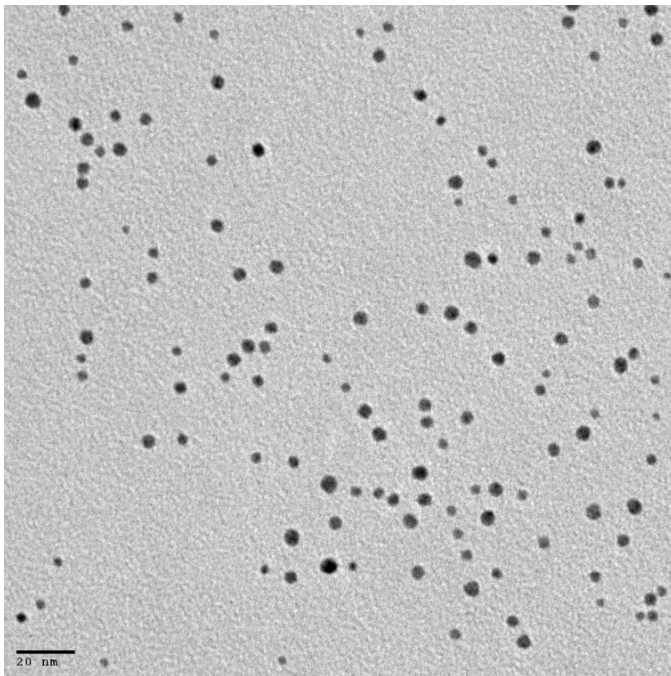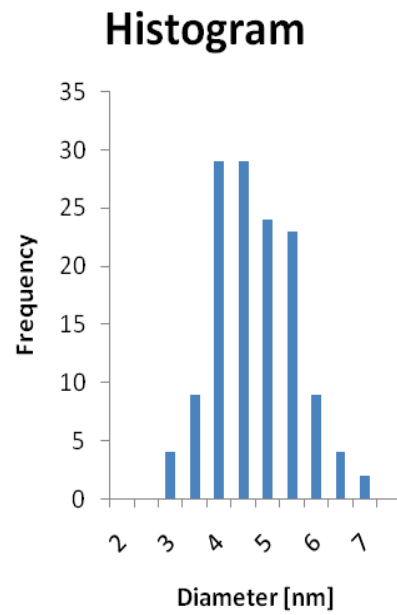

**Figure S10b.** TEM image of striped Au-DPT<sub>0.21</sub>DDT<sub>0.79</sub> ( $D=4.43\pm 0.86$  nm)

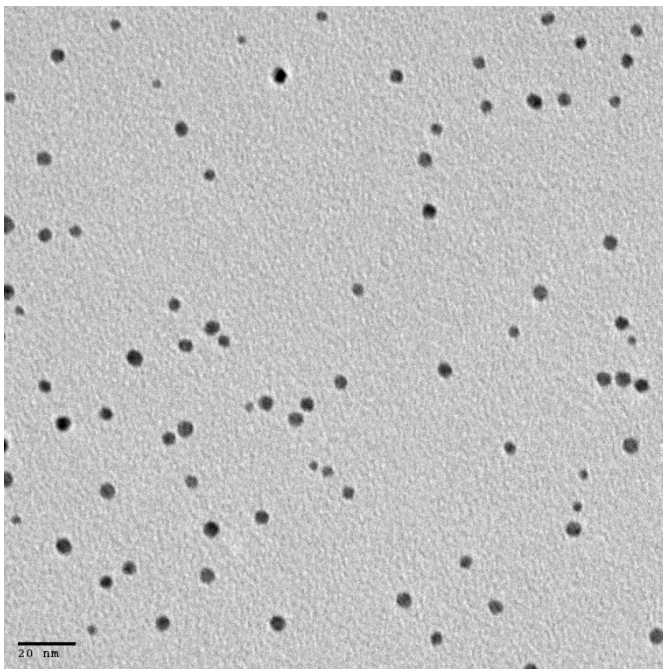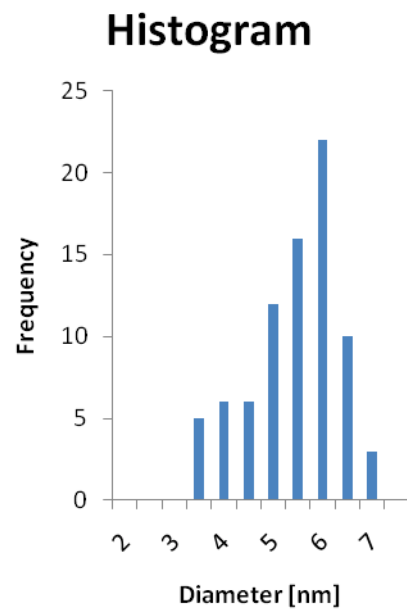

**Figure S10c.** TEM image of striped Au-DPT<sub>0.27</sub>DDT<sub>0.73</sub> ( $D=5.30\pm 0.89$  nm)

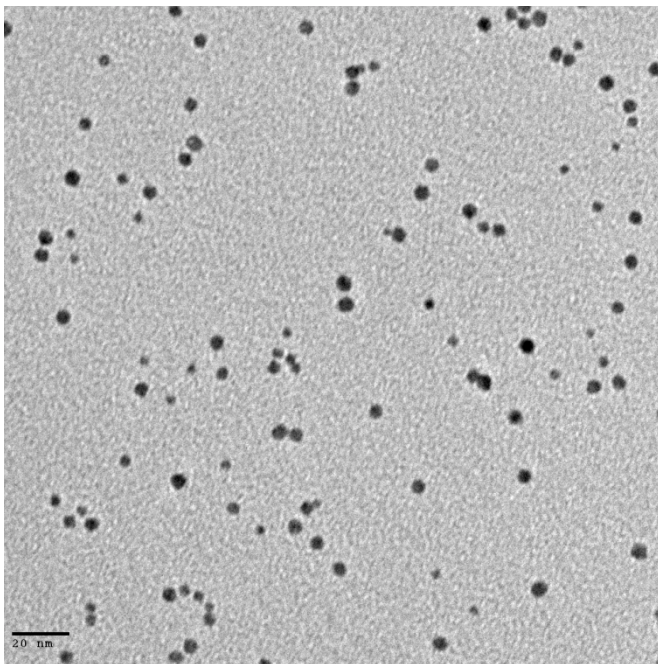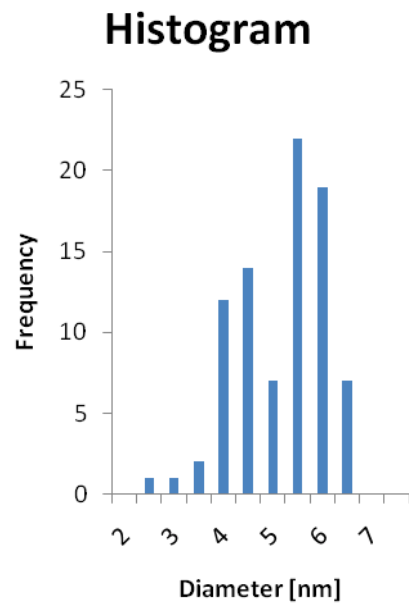

**Figure S10d.** TEM image of striped Au-DPT<sub>0.40</sub>DDT<sub>0.60</sub> ( $D=5.19\pm 0.91$  nm)

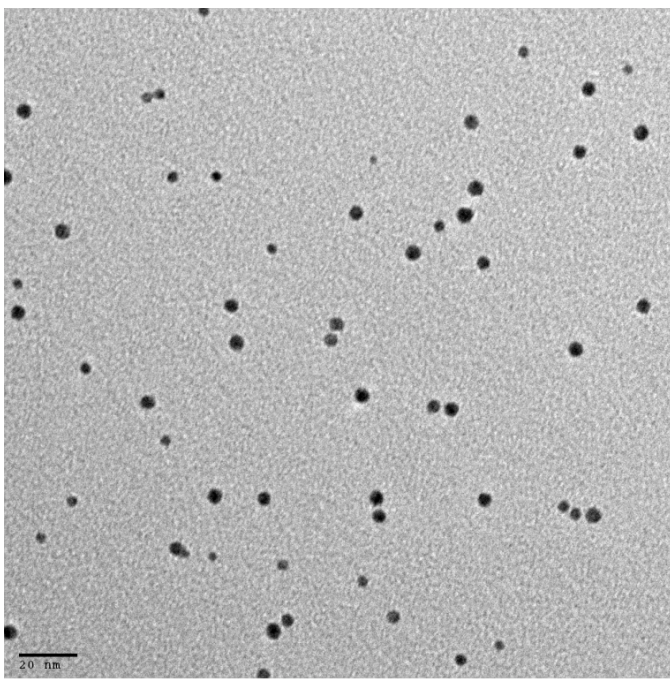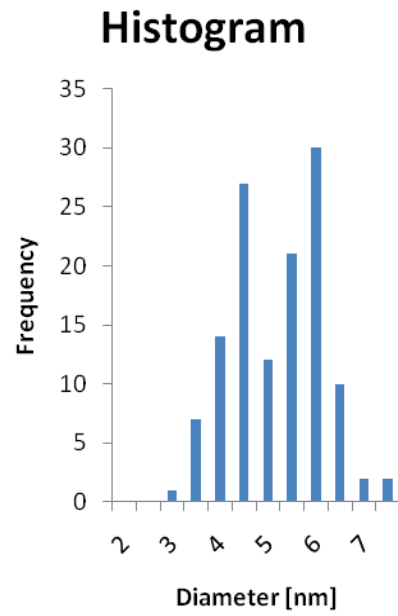

**Figure S10e.** TEM image of striped Au-DPT<sub>0.58</sub>DDT<sub>0.42</sub> ( $D=5.05\pm 0.97$  nm)

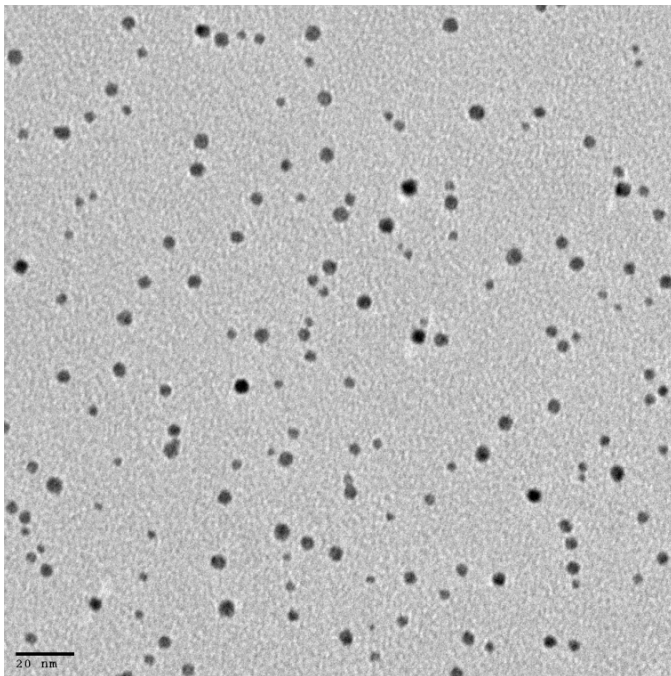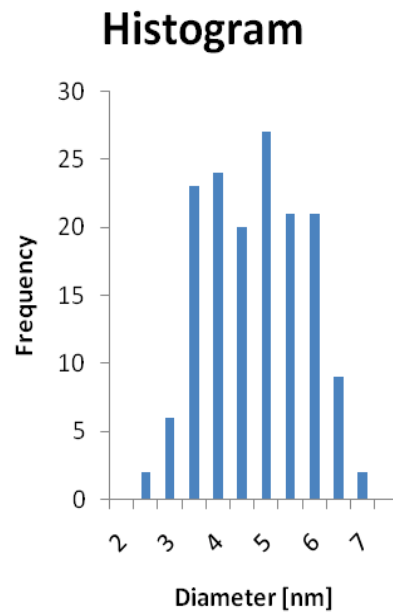

**Figure S10f.** TEM image of striped Au-DPT<sub>0.68</sub>DDT<sub>0.32</sub> ( $D=4.54\pm 1.00$  nm)

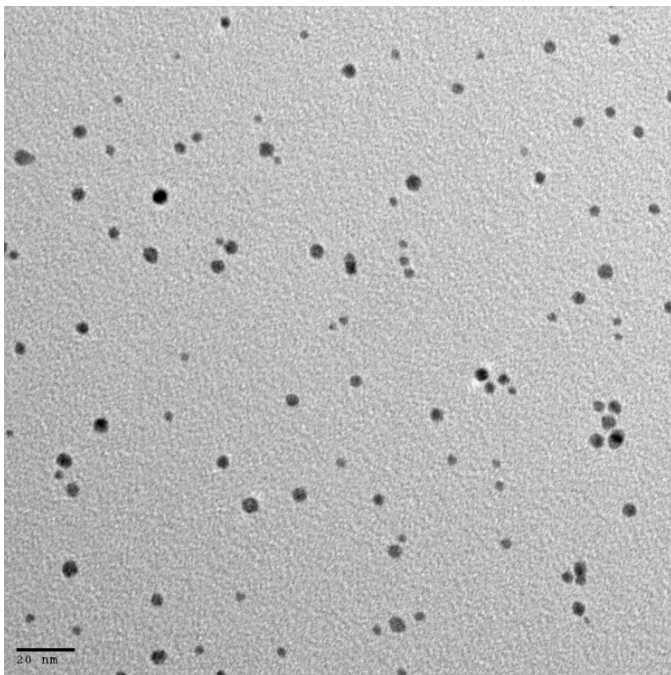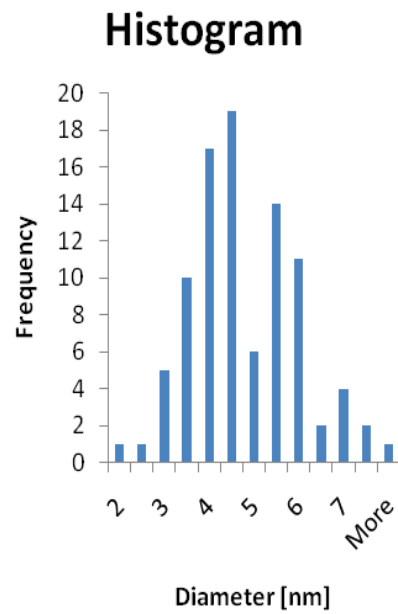

**Figure S10g.** TEM image of striped Au-DPT<sub>0.78</sub>DDT<sub>0.22</sub> ( $D=4.32\pm 1.21$  nm)

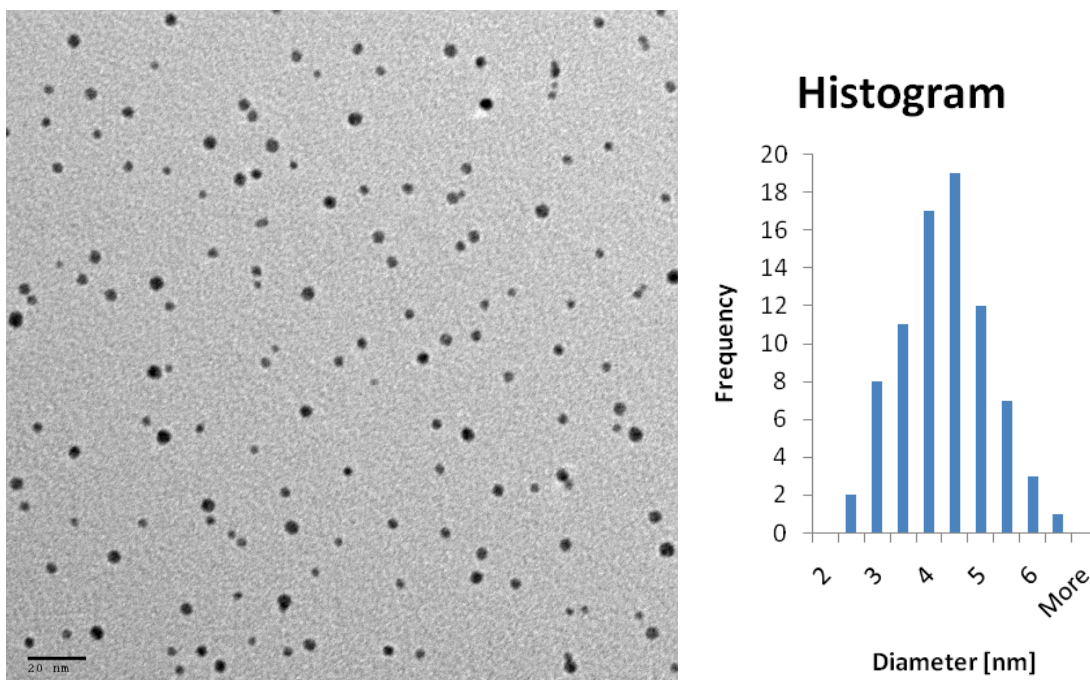

**Figure S10h.** TEM image of ~4 nm Au-DPT ( $D=4.02\pm 0.85$  nm)

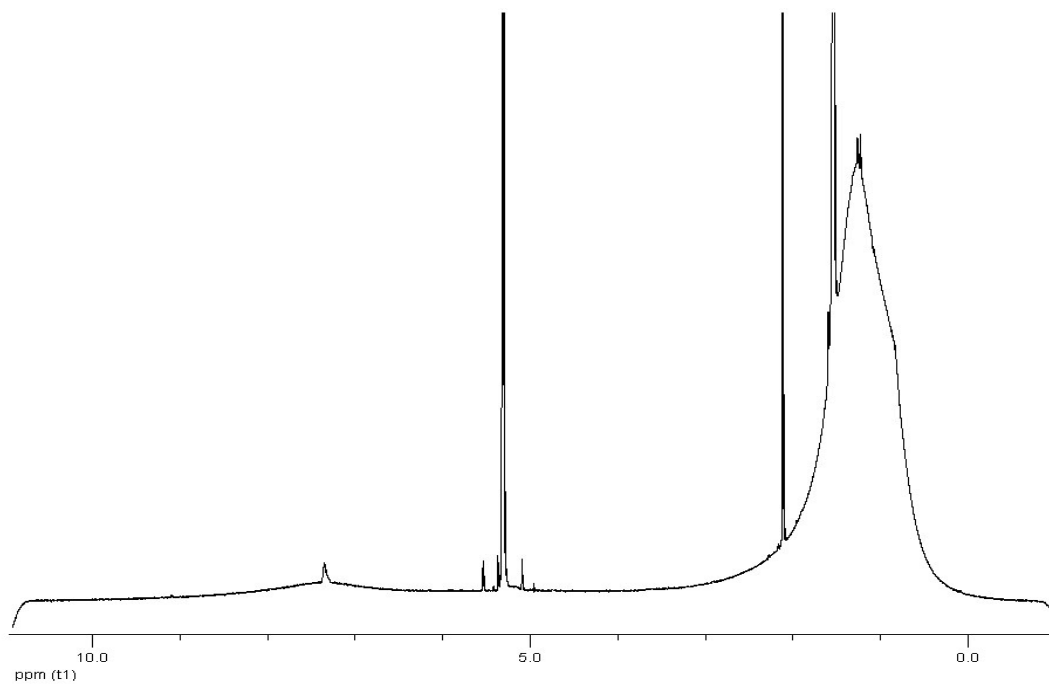

**Figure S11a.** <sup>1</sup>H NMR of striped Au-DPT<sub>0.13</sub>DDT<sub>0.87</sub> ( $D=4.93\pm 0.91$  nm)

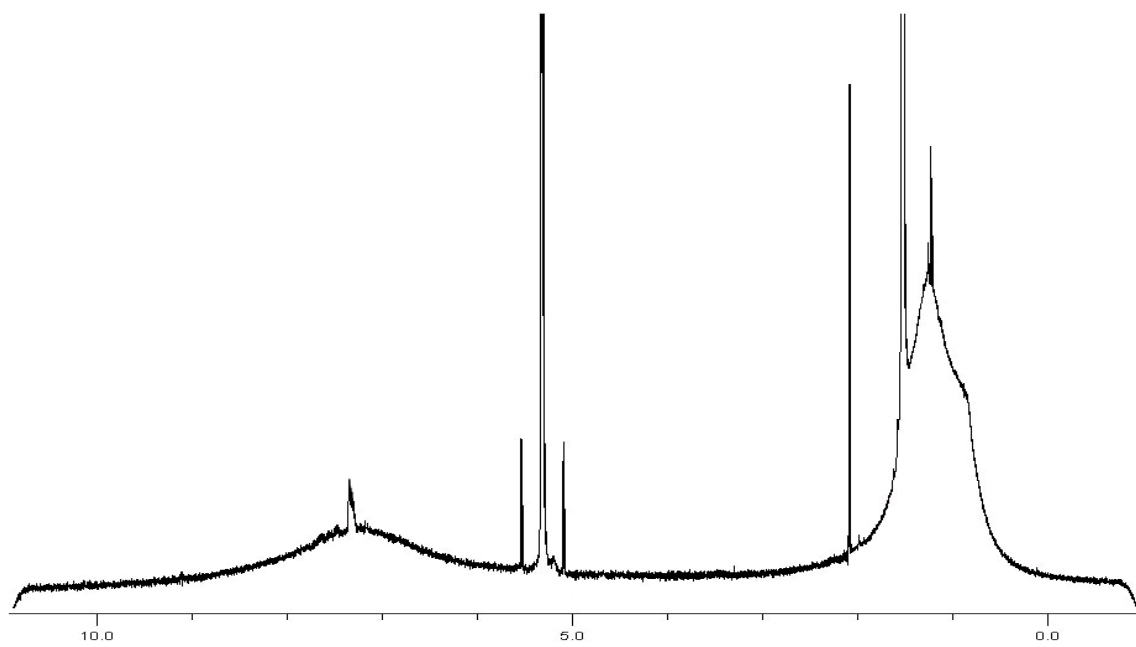

**Figure S11b.** <sup>1</sup>H NMR of striped Au-DPT<sub>0.21</sub>DDT<sub>0.79</sub>

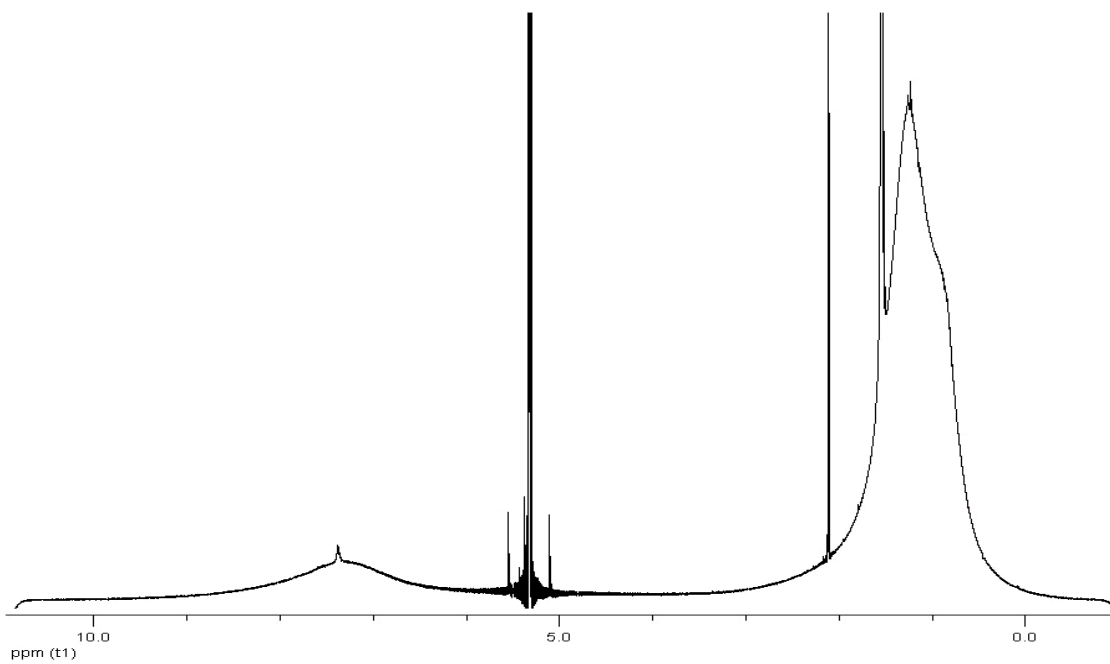

**Figure S11c.** <sup>1</sup>H NMR of striped Au-DPT<sub>0.27</sub>DDT<sub>0.73</sub>

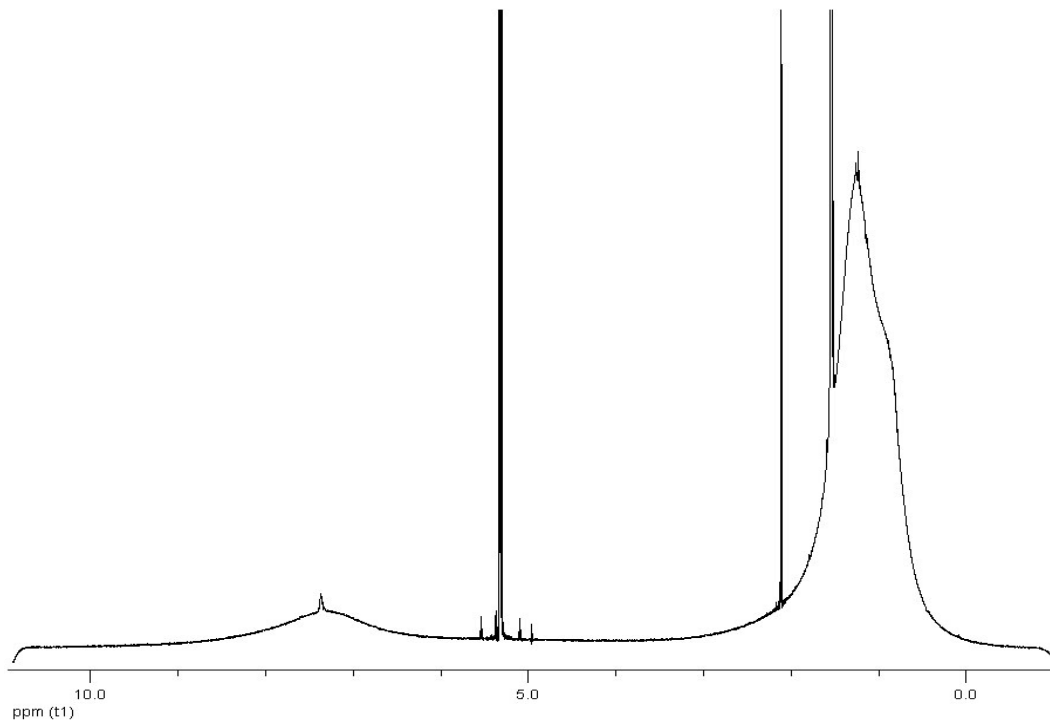

**Figure S11d.** <sup>1</sup>H NMR of striped Au-DPT<sub>0.40</sub>DDT<sub>0.60</sub>

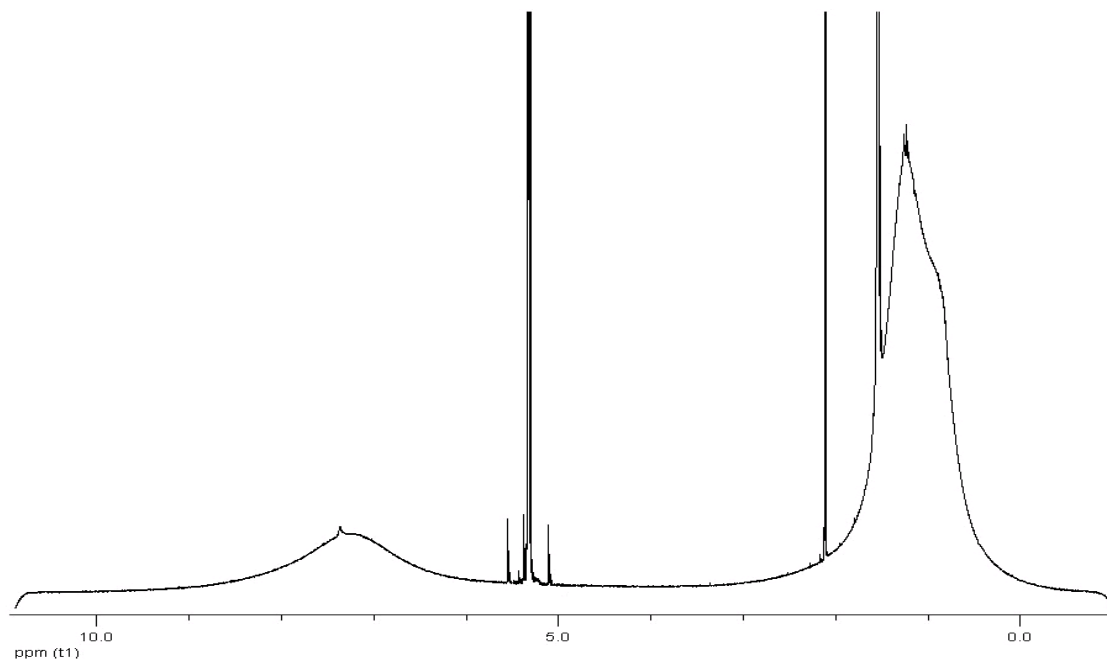

**Figure S11e.** <sup>1</sup>H NMR of striped Au-DPT<sub>0.58</sub>DDT<sub>0.42</sub>

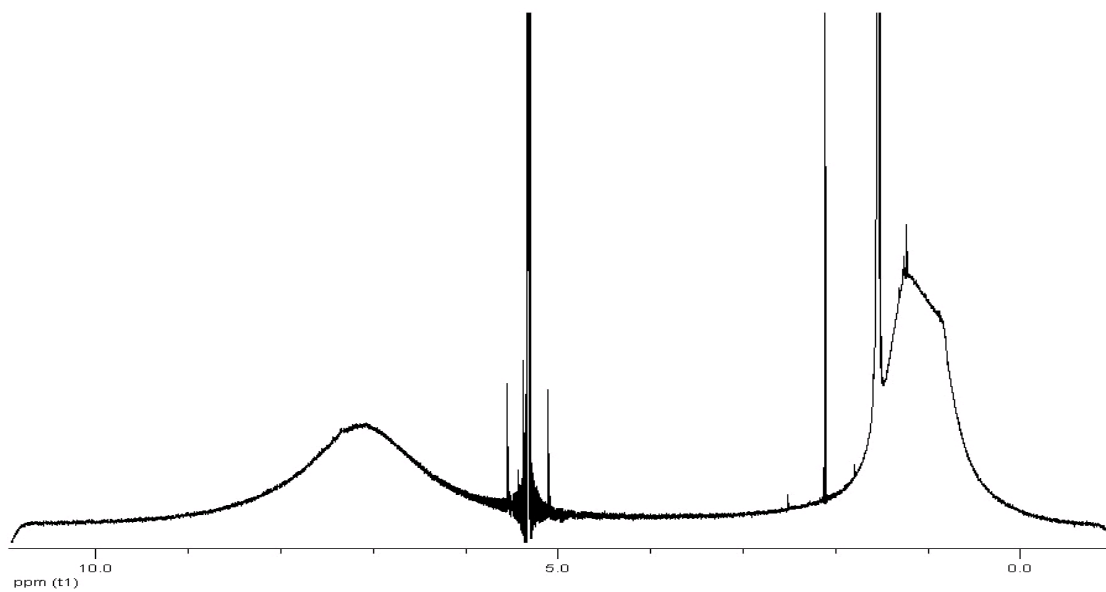

**Figure S11f.** <sup>1</sup>H NMR of striped Au-DPT<sub>0.68</sub>DDT<sub>0.32</sub>

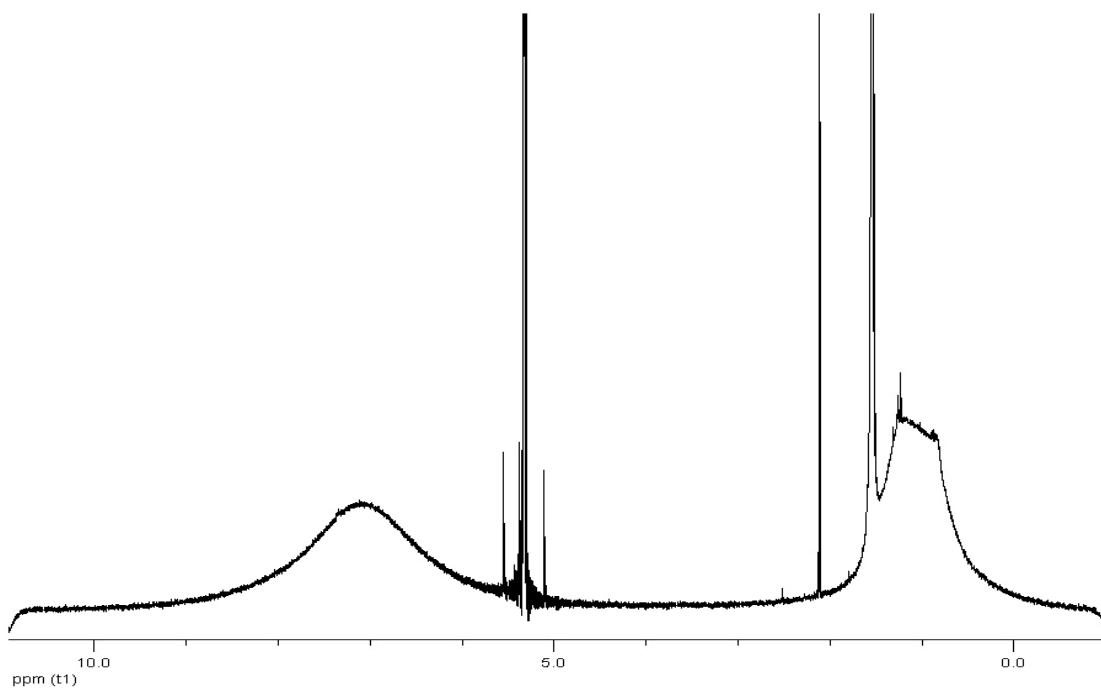

**Figure S11g.** <sup>1</sup>H NMR of striped Au-DPT<sub>0.78</sub>DDT<sub>0.22</sub>

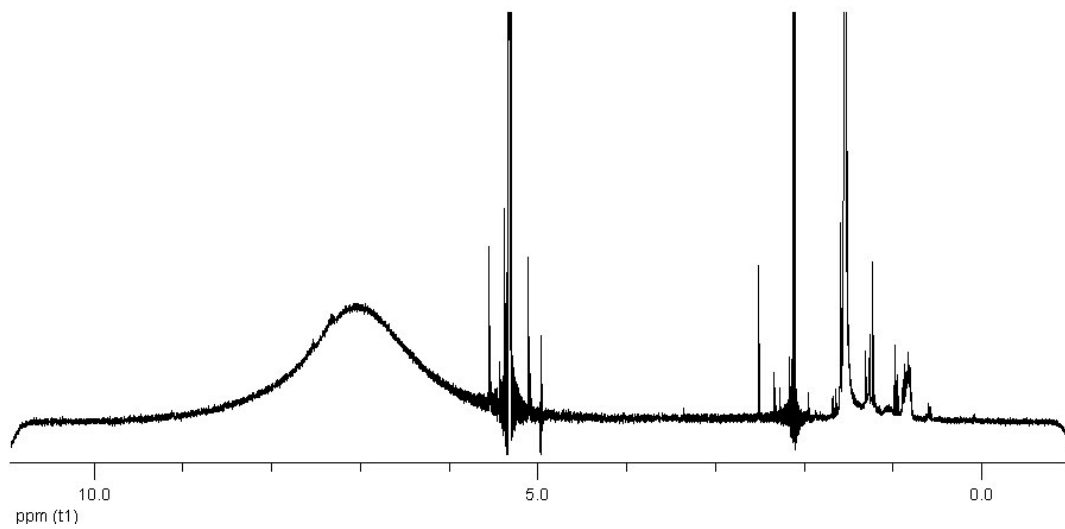

**Figure S11h.**  $^1\text{H}$  NMR of  $\sim 4$  nm Au-DPT

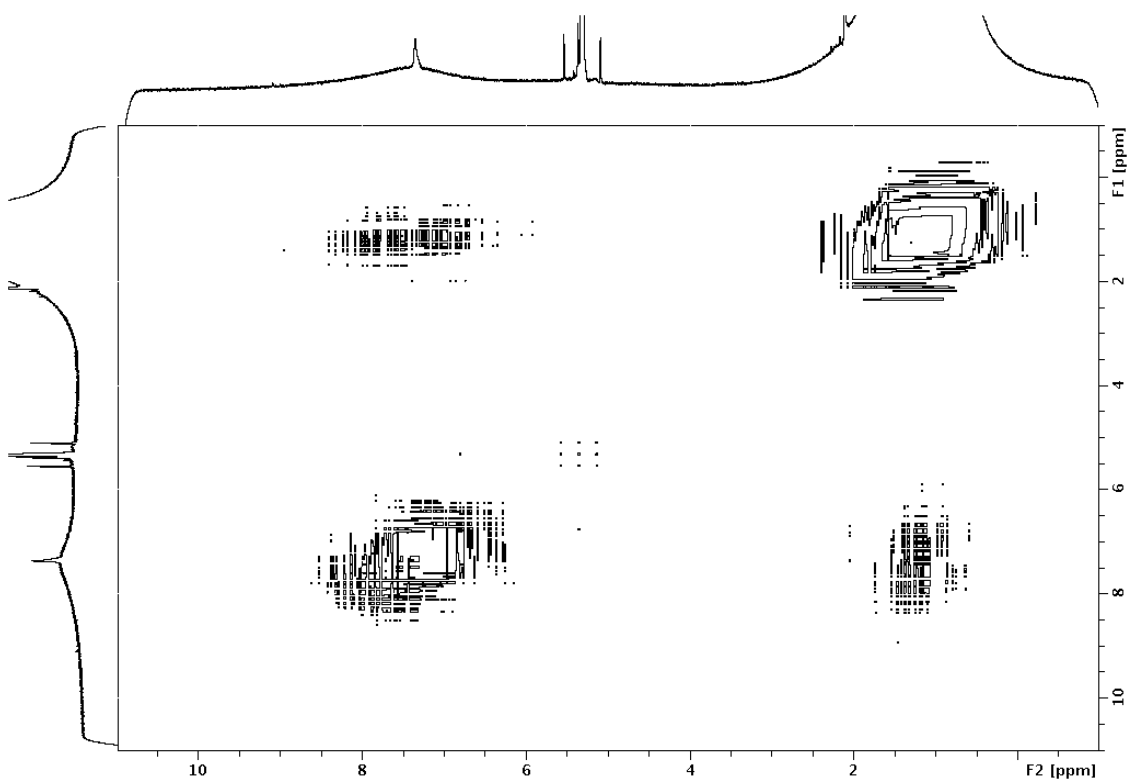

**Figure S12a.** NOESY of striped Au-DPT<sub>0.13</sub>DDT<sub>0.87</sub>



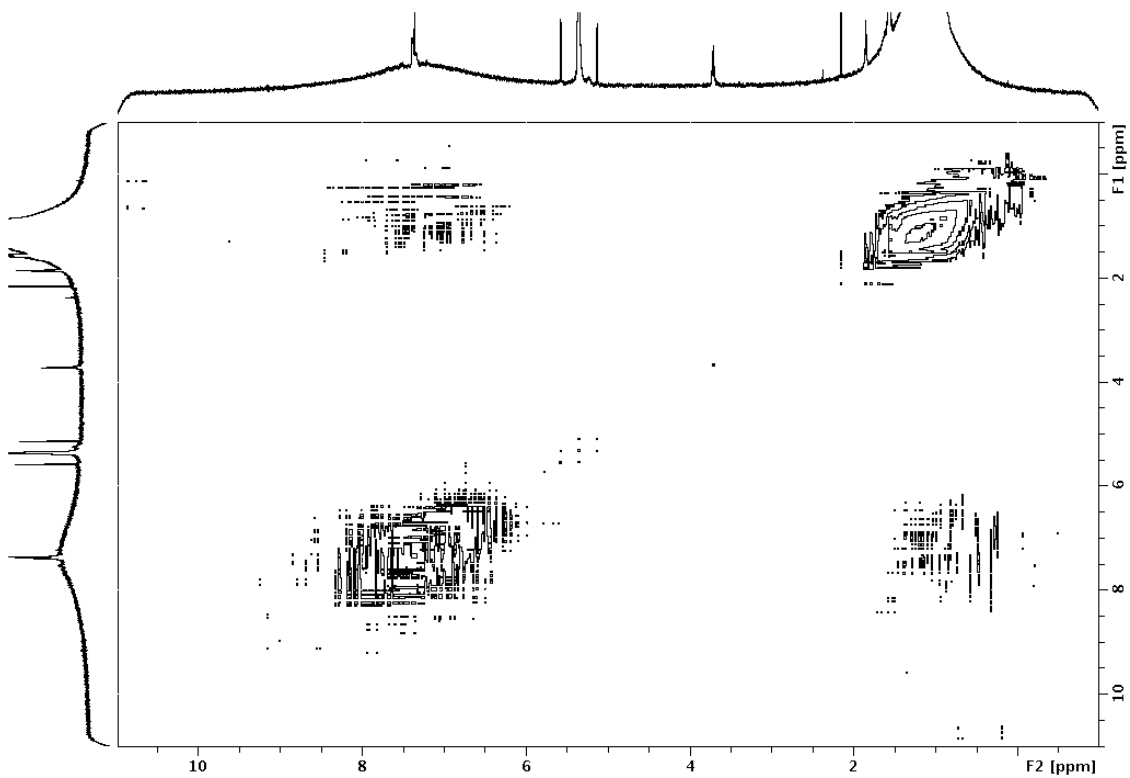

**Figure S12b.** NOESY of striped Au-DPT<sub>0.21</sub>DDT<sub>0.79</sub>

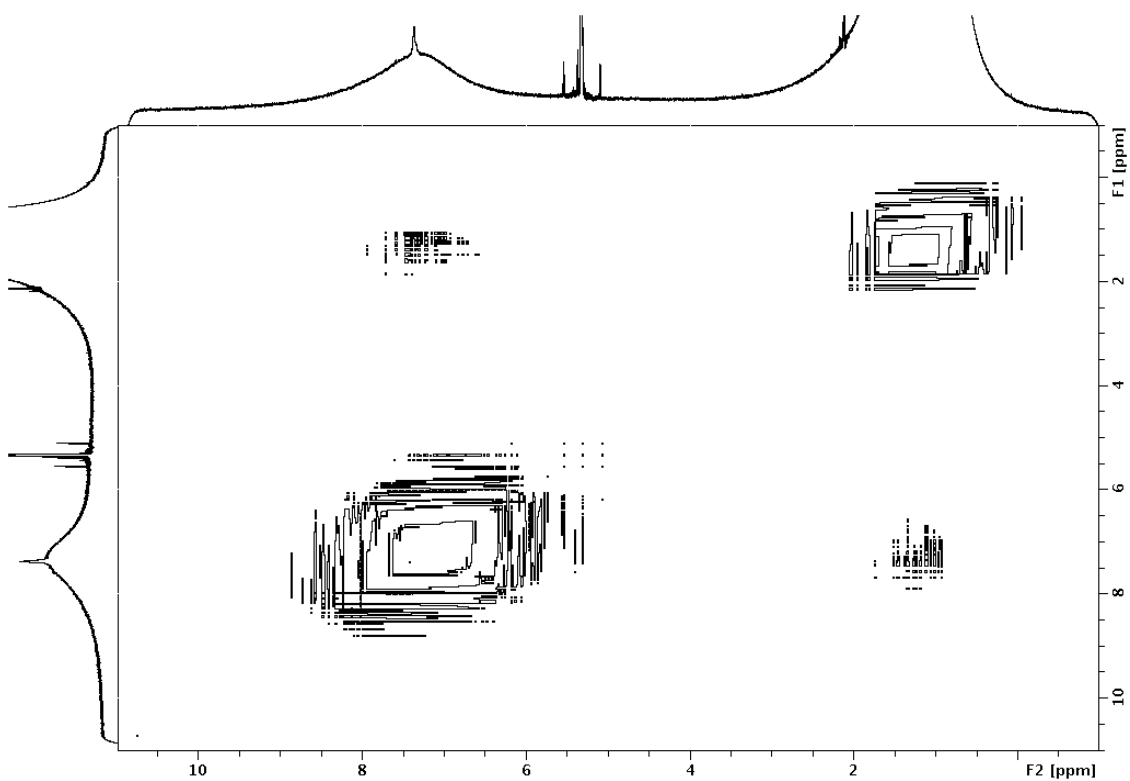

**Figure S12c.** NOESY of striped Au-DPT<sub>0.27</sub>DDT<sub>0.73</sub>

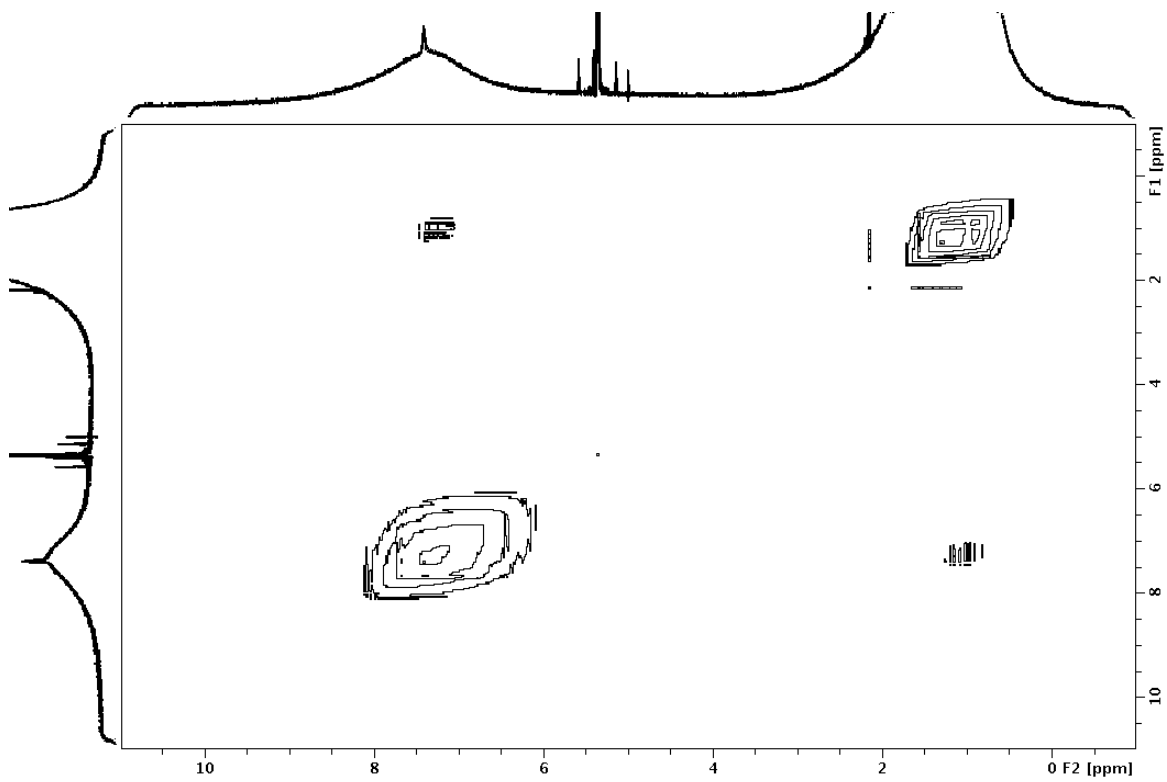

**Figure S12d.** NOESY of striped Au-DPT<sub>0.40</sub>DDT<sub>0.60</sub>

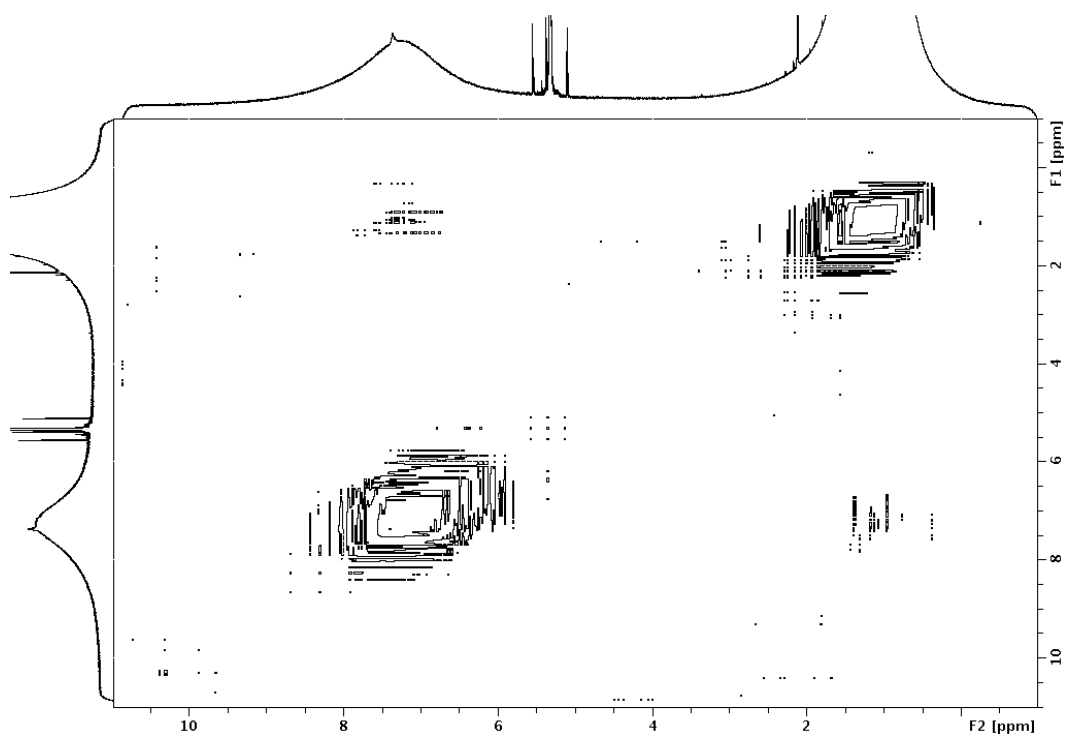

**Figure S12e.** NOESY of striped Au-DPT<sub>0.58</sub>DDT<sub>0.42</sub>

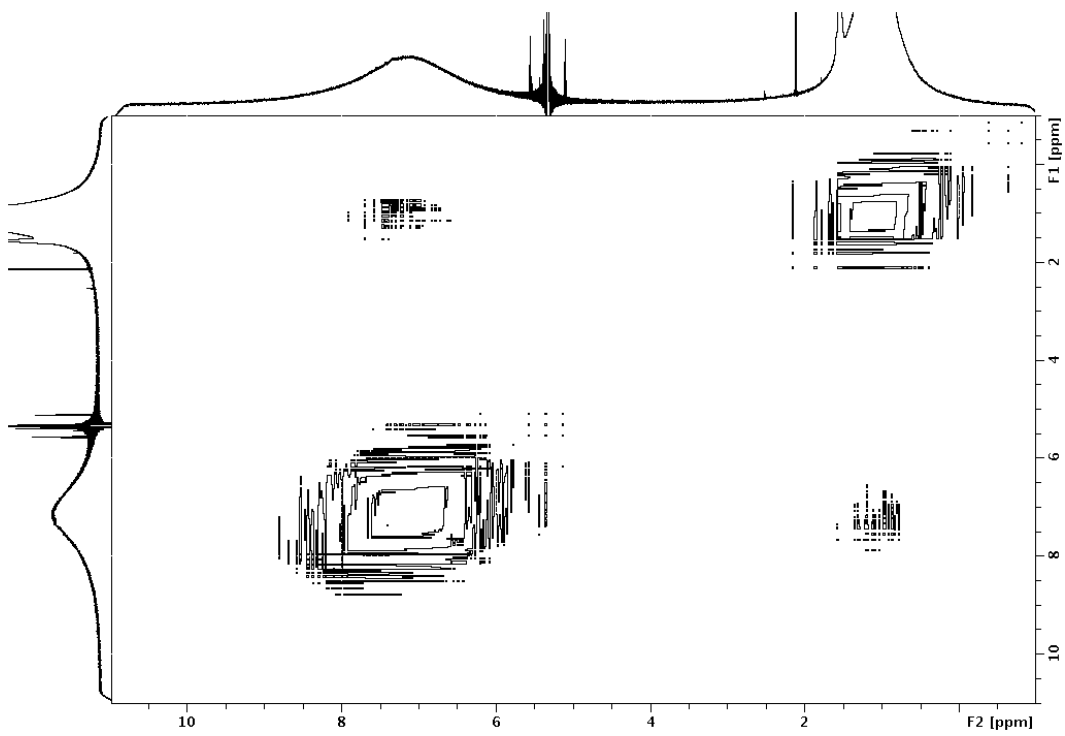

**Figure S12f.** NOESY of striped Au-DPT<sub>0.68</sub>DDT<sub>0.32</sub>

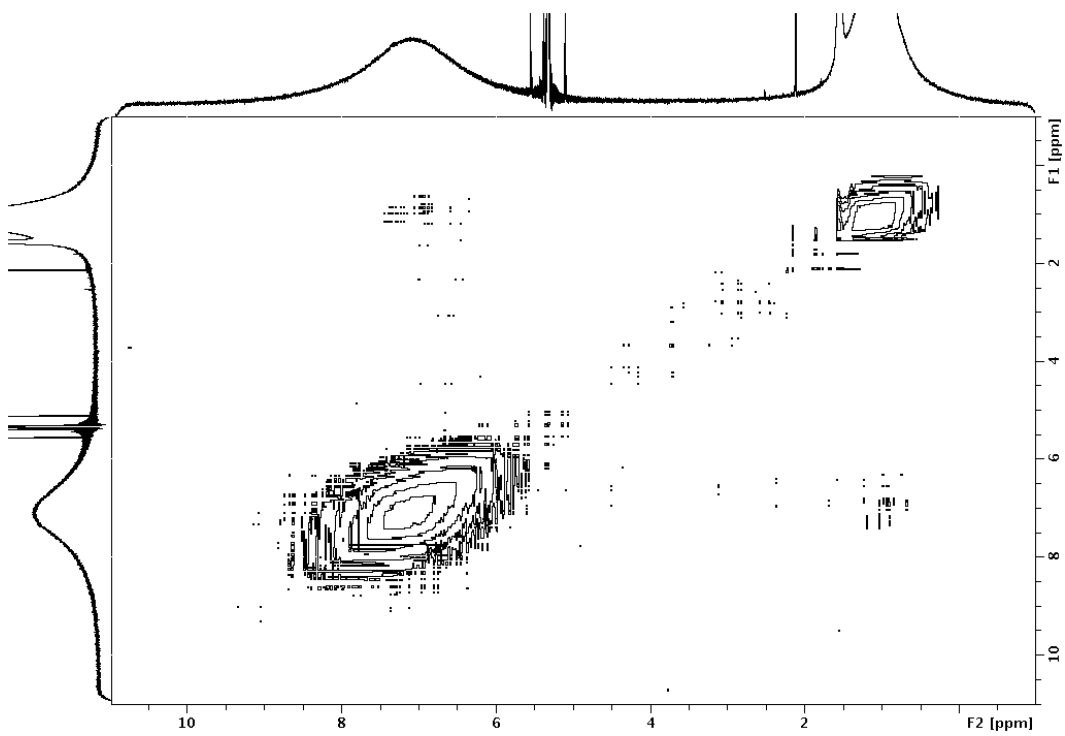

**Figure S12g.** NOESY of striped Au-DPT<sub>0.78</sub>DDT<sub>0.22</sub>

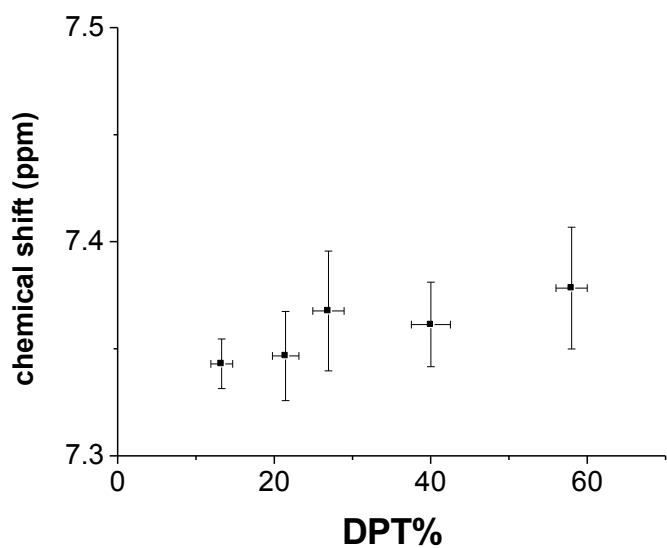

**Figure S13.** Chemical shift of the sharp peak on striped nanoparticles as a function of DPT%

a.

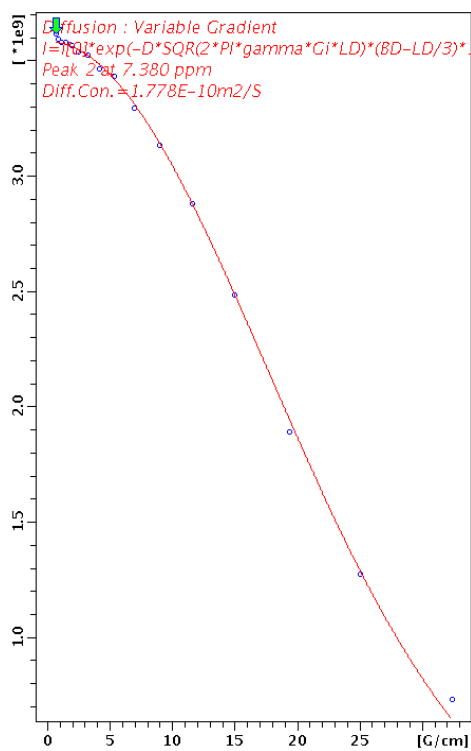

b.

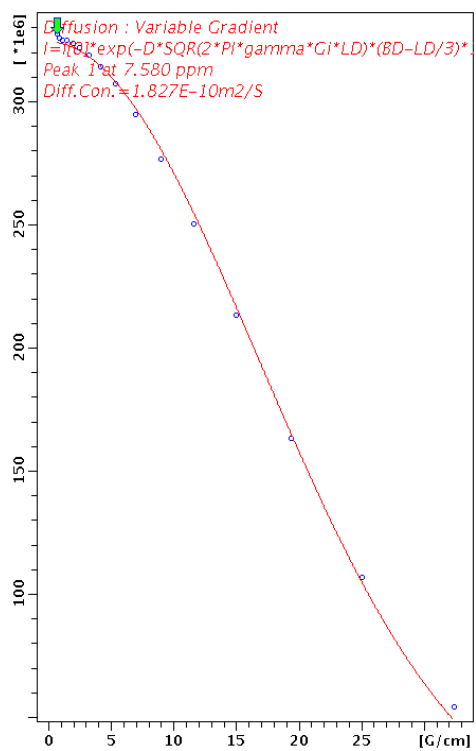

c.

d.

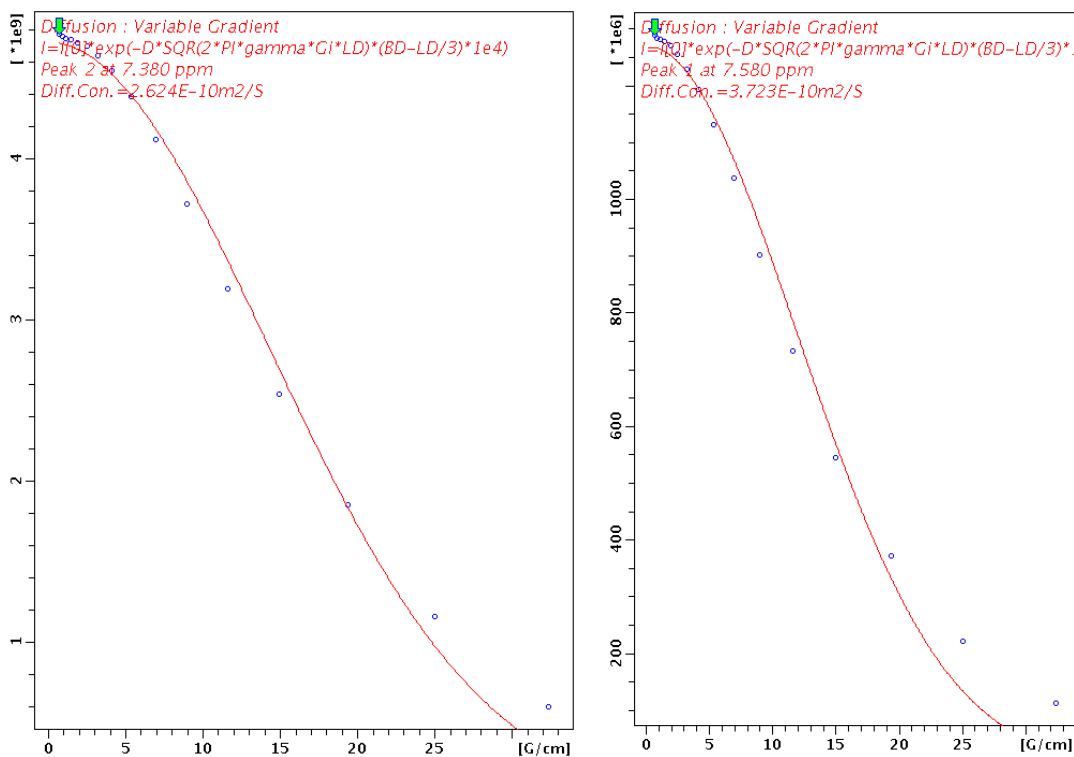

**Figure S14.** Diffusion coefficient of nanoparticles by DOSY NMR. a: pure nanoparticles at 7.38 ppm. b: pure nanoparticles at 7.58 ppm. c: mixture of nanoparticles and free DPT at 7.38 ppm. d: mixture of nanoparticles and DPT at 7.58 ppm. The  $^1\text{H}$  NMR spectrum of nanoparticles and DPT mixture is shown in Figure S12d.

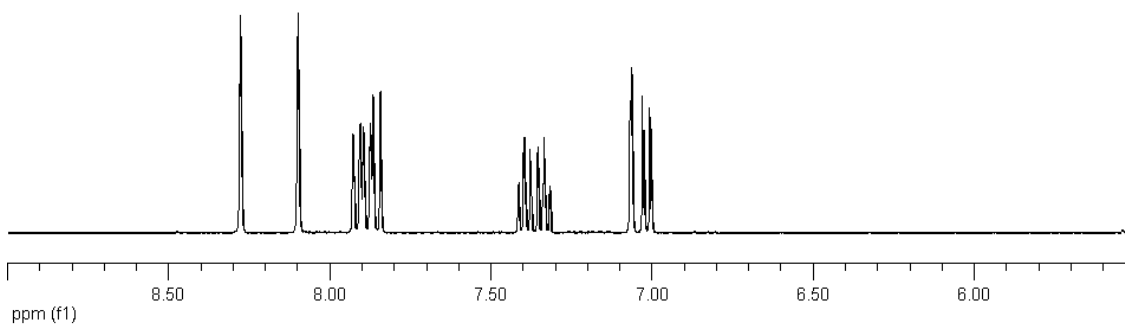

**Figure S15.**  $^1\text{H}$  NMR of aminoanthracene (5.5-9 ppm) in  $\text{CD}_2\text{Cl}_2$

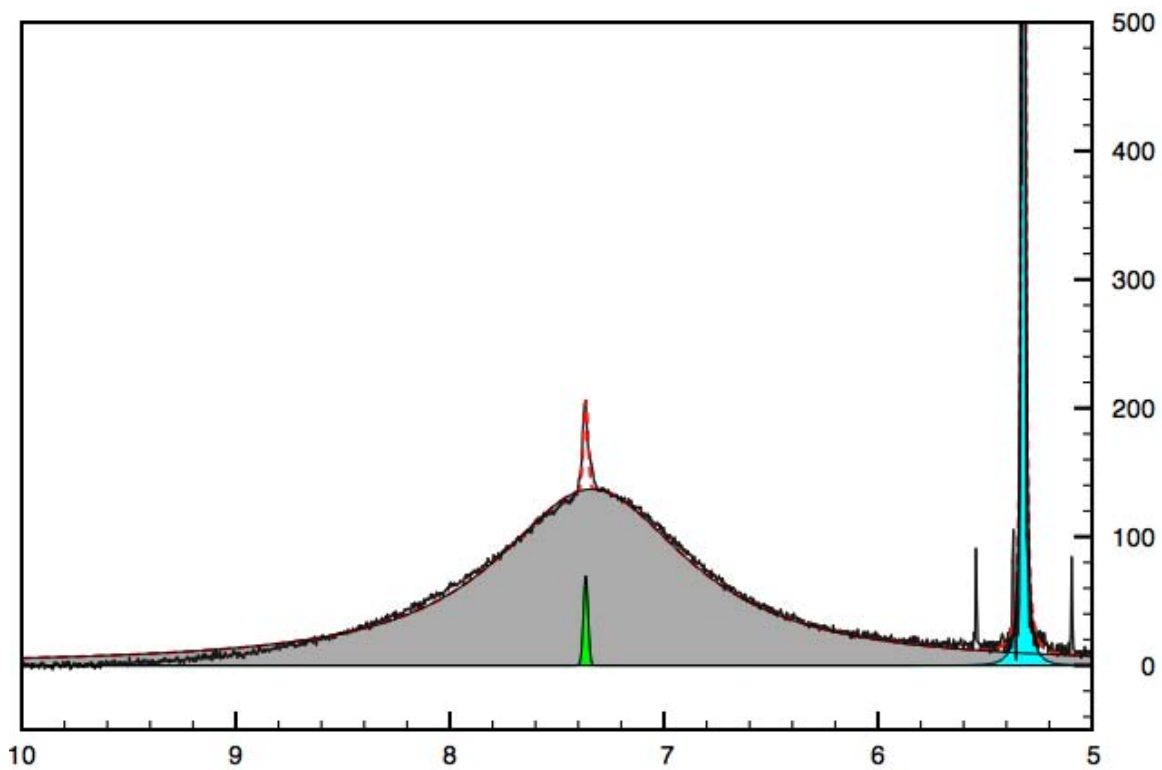

**Figure S16.** Representative peak deconvolution by Gaussian-Lorentzian fit

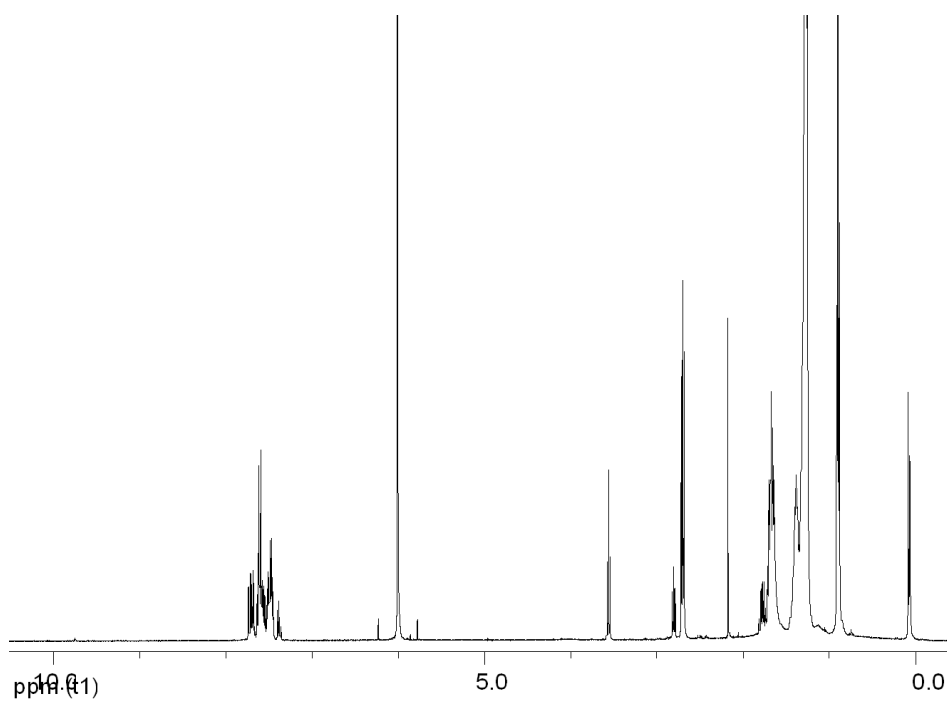

**Figure S17.** Representative <sup>1</sup>H NMR of ligand cleaved from nanoparticle surface by heating in CDCl<sub>2</sub>-CDCl<sub>2</sub> at 75 °C for a week.

Table S1. Size, ligand composition and chemical shift of the broad aryl peak of random NP

| Entry                      | Diameter (nm) | DPT%             | Peak center (ppm)  |
|----------------------------|---------------|------------------|--------------------|
| 1a                         | 4.54±0.82     | 22.2             | 7.38               |
| 1b                         | 4.27±0.88     | 25.8             | 7.34               |
| 1c                         | 4.32±0.97     | 20.1             | 7.355              |
| <b>1<sub>average</sub></b> |               | <b>22.7±2.88</b> | <b>7.358±0.020</b> |
| 2a                         | 4.42±0.70     | 34.6             | 7.32               |
| 2b                         | 4.56±0.89     | 35.9             | 7.3                |
| 2c                         | 4.15±0.76     | 38.5             | 7.275              |
| <b>2<sub>average</sub></b> |               | <b>36.3±1.99</b> | <b>7.298±0.023</b> |
| 3a                         | 4.17±0.89     | 45.7             | 7.275              |
| 3b                         | 4.38±0.94     | 48.6             | 7.255              |
| 3c                         | 4.16±1.02     | 50.4             | 7.23               |
| <b>3<sub>average</sub></b> |               | <b>48.2±2.37</b> | <b>7.253±0.023</b> |
| 4a                         | 4.41±1.01     | 60.3             | 7.225              |
| 4b                         | 4.23±0.79     | 62.4             | 7.195              |
| 4c                         | 4.20±0.87     | 58.6             | 7.25               |
| <b>4<sub>average</sub></b> |               | <b>60.4±1.90</b> | <b>7.223±0.027</b> |
| 5a                         | 4.24±0.69     | 70.9             | 7.15               |
| 5b                         | 4.25±0.99     | 74.2             | 7.135              |
| 5c                         | 4.31±0.84     | 67.2             | 7.18               |
| <b>5<sub>average</sub></b> |               | <b>70.8±3.50</b> | <b>7.155±0.023</b> |
| 6a                         | 4.14±0.99     | 82.2             | 7.15               |
| 6b                         | 4.16±0.93     | 76.3             | 7.17               |

|                            |           |                  |                    |
|----------------------------|-----------|------------------|--------------------|
| 6c                         | 4.25±1.01 | 86               | 7.10               |
| <b>6<sub>average</sub></b> |           | <b>81.5±4.89</b> | <b>7.140±0.036</b> |
| 7a                         | 4.20±0.96 | 93.9             | 7.045              |
| 7b                         | 4.09±0.76 | 91.4             | 7.055              |
| 7c                         | 4.11±0.88 | 94.9             | 7.025              |
| <b>7<sub>average</sub></b> |           | <b>93.4±1.80</b> | <b>7.042±0.015</b> |
| 8a                         | 4.02±0.85 | 100              | 7.025              |
| 8b                         | 4.12±0.93 | 100              | 7.00               |
| 8c                         | 4.03±0.94 | 100              | 6.955              |
| <b>8<sub>average</sub></b> |           | <b>100</b>       | <b>6.993±0.035</b> |

Table S2. Size, ligand composition and chemical shift of the broad aryl peak of Janus NP

| Entry                      | Diameter (nm) | DPT%             | Peak center (ppm)  |
|----------------------------|---------------|------------------|--------------------|
| 1a                         | 2.36±0.38     | 9.8              | 7.41               |
| 1b                         | 2.28±0.37     | 11.4             | 7.405              |
| 1c                         | 2.44±0.45     | 13.7             | 7.375              |
| <b>1<sub>average</sub></b> |               | <b>11.6±1.96</b> | <b>7.397±0.019</b> |
| 2a                         | 2.39±0.32     | 18.7             | 7.31               |
| 2b                         | 2.42±0.40     | 21.2             | 7.305              |
| 2c                         | 2.36±0.39     | 23.5             | 7.27               |
| <b>2<sub>average</sub></b> |               | <b>21.1±2.40</b> | <b>7.295±0.022</b> |
| 3a                         | 2.55±0.39     | 27.5             | 7.21               |
| 3b                         | 2.44±0.34     | 33.1             | 7.21               |
| 3c                         | 2.35±0.36     | 30.0             | 7.22               |
| <b>3<sub>average</sub></b> |               | <b>30.2±2.81</b> | <b>7.213±0.006</b> |



|                            |           |                  |                    |
|----------------------------|-----------|------------------|--------------------|
| 4a                         | 2.38±0.35 | 40.7             | 7.185              |
| 4b                         | 2.42±0.41 | 43.3             | 7.165              |
| 4c                         | 2.29±0.34 | 45.8             | 7.14               |
| <b>4<sub>average</sub></b> |           | <b>43.3±2.55</b> | <b>7.163±0.023</b> |
| 5a                         | 2.28±0.36 | 56.4             | 7.11               |
| 5b                         | 2.52±0.40 | 56.2             | 7.135              |
| 5c                         | 2.40±0.37 | 60.8             | 7.04               |
| <b>5<sub>average</sub></b> |           | <b>57.8±2.60</b> | <b>7.095±0.049</b> |
| 6a                         | 2.30±0.37 | 70.3             | 7.085              |
| 6b                         | 2.26±0.33 | 72.9             | 7.06               |
| 6c                         | 2.58±0.54 | 68.9             | 7.1                |
| <b>6<sub>average</sub></b> |           | <b>70.7±2.03</b> | <b>7.082±0.020</b> |
| 7a                         | 2.33±0.33 | 81.9             | 7.09               |
| 7b                         | 2.31±0.35 | 84.4             | 7.075              |
| 7c                         | 2.29±0.34 | 85.2             | 7.055              |
| <b>7<sub>average</sub></b> |           | <b>83.8±1.72</b> | <b>7.073±0.176</b> |
| 8a                         | 2.20±0.37 | 100              | 7.06               |
| 8b                         | 2.28±0.34 | 100              | 7.035              |
| 8c                         | 2.33±0.35 | 100              | 7.015              |
| <b>8<sub>average</sub></b> |           | <b>100</b>       | <b>7.034±0.023</b> |

Table S3. Size, ligand composition and chemical shift of the broad aryl peak of Stripe NP

| Entry | Diameter (nm) | DPT% | Peak center (ppm) |
|-------|---------------|------|-------------------|
| 1a    | 4.93±0.91     | 16.6 | 7.39              |
| 1b    | 5.24±1.02     | 12.6 | 7.365             |

|                            |           |                   |                    |
|----------------------------|-----------|-------------------|--------------------|
| 1c                         | 5.32±1.10 | 11.2              | 7.35               |
| <b>1<sub>average</sub></b> |           | <b>13.47±2.80</b> | <b>7.368±0.020</b> |
| 2a                         | 4.43±0.86 | 21.4              | 7.3                |
| 2b                         | 4.87±0.95 | 22.9              | 7.31               |
| 2c                         | 5.13±1.07 | 19.8              | 7.325              |
| <b>2<sub>average</sub></b> |           | <b>21.37±1.55</b> | <b>7.312±0.013</b> |
| 3a                         | 5.30±0.89 | 27.1              | 7.33               |
| 3b                         | 5.21±0.94 | 29                | 7.31               |
| 3c                         | 4.95±1.06 | 24.8              | 7.325              |
| <b>3<sub>average</sub></b> |           | <b>26.97±2.10</b> | <b>7.323±0.010</b> |
| 4a                         | 5.19±0.91 | 40.2              | 7.33               |
| 4b                         | 5.06±0.88 | 43.1              | 7.30               |
| 4c                         | 4.84±0.93 | 37.7              | 7.305              |
| <b>4<sub>average</sub></b> |           | <b>40.33±2.70</b> | <b>7.311±0.016</b> |
| 5a                         | 5.05±0.97 | 57.9              | 7.33               |
| 5b                         | 4.80±0.92 | 59.6              | 7.31               |
| 5c                         | 4.75±0.87 | 56.1              | 7.25               |
| <b>5<sub>average</sub></b> |           | <b>57.87±1.75</b> | <b>7.293±0.047</b> |
| 6a                         | 4.54±1.00 | 67.6              | 7.13               |
| 6b                         | 4.47±0.84 | 71.3              | 7.125              |
| 6c                         | 4.39±1.17 | 66.3              | 7.21               |
| <b>6<sub>average</sub></b> |           | <b>67.40±2.59</b> | <b>7.155±0.048</b> |
| 7a                         | 4.32±1.21 | 77.7              | 7.10               |
| 7b                         | 4.26±0.96 | 80.4              | 7.085              |
| 7c                         | 4.18±0.86 | 76.2              | 7.155              |

|                             |           |                   |                    |
|-----------------------------|-----------|-------------------|--------------------|
| <b>7</b> <sub>average</sub> |           | <b>78.10±2.12</b> | <b>7.113±0.037</b> |
| 8a                          | 4.02±0.85 | 100               | 7.025              |
| 8b                          | 4.12±0.93 | 100               | 7.00               |
| 8c                          | 4.03±0.94 | 100               | 6.955              |
| <b>8</b> <sub>average</sub> |           | <b>100</b>        | <b>6.993±0.035</b> |

Table S4. Ligand composition and FWHM of broad peak (b.p) and sharp peak (s.p.) of Stripe NP

| Entry                       | DPT%       | FWHM (b.p.) | FWHM (s.p.) |
|-----------------------------|------------|-------------|-------------|
| <b>1</b> <sub>average</sub> | 13.47±2.80 | 1.14±0.23   | 0.054±0.002 |
| <b>2</b> <sub>average</sub> | 21.37±1.55 | 1.21±0.12   | 0.052±0.005 |
| <b>3</b> <sub>average</sub> | 26.97±2.10 | 1.13±0.19   | 0.047±0.009 |
| <b>4</b> <sub>average</sub> | 40.33±2.70 | 1.19±0.18   | 0.045±0.014 |
| <b>5</b> <sub>average</sub> | 57.87±1.75 | 1.19±0.13   | No peak     |
| <b>6</b> <sub>average</sub> | 67.40±2.59 | 1.23±0.11   | No peak     |
| <b>7</b> <sub>average</sub> | 78.10±2.12 | 1.22±0.07   | No peak     |
| <b>8</b> <sub>average</sub> | 100        | 1.15±0.12   | No peak     |
